# Supplementary material for: Tracing the transition from covalent to non-covalent functionalization of pyrene through C-, N-, and O-based ionic and radical substrates using quantum mechanical calculations
Source: Royal Society of Chemistry journal article supplement (doi:10.1039/d3ra01457f), 2023-01-01
Supplement: d3ra01457f1.pdf [file d3ra01457f1.pdf]

**[Supporting Information]**

**Tracing the Transition from Covalent to Non-covalent  
Functionalization of Pyrene through C-, N-, and O- based Ionic  
and Radical Substrates using Quantum Mechanical Calculations**

Anwesh Pandey\*, Nandan Kumar\*

Advanced Computation and Data Sciences Division, CSIR-North East Institute of Science and  
Technology, Jorhat-785006, Assam, India

\*Corresponding Authors Email: [apdapbbau@gmail.com](mailto:apdapbbau@gmail.com), [mr.kumarnandan@gmail.com](mailto:mr.kumarnandan@gmail.com)

## List of Figures and Tables:

**Figure S1.** Geometric parameters of cationic, anionic, and radical substrates (H and CH<sub>3</sub>) interacting with pyrene obtained at M06-2X/6-31G\* level of theory.

**Figure S2.** Geometric parameters of cationic, anionic, and radical substrates ((CH<sub>3</sub>)CH<sub>2</sub>, (CH<sub>3</sub>)<sub>2</sub>CH, and (CH<sub>3</sub>)<sub>3</sub>C) interacting with pyrene obtained at M06-2X/6-31G\* level of theory.

**Figure S3.** Geometric parameters of cationic, anionic, and radical substrates ((C<sub>6</sub>H<sub>5</sub>)CH<sub>2</sub>, (C<sub>6</sub>H<sub>5</sub>)<sub>2</sub>CH, and (C<sub>6</sub>H<sub>5</sub>)<sub>3</sub>C) interacting with pyrene obtained at M06-2X/6-31G\* level of theory.

**Figure S4.** Geometric parameters of cationic, anionic, and radical substrates (NH<sub>2</sub>, (CH<sub>3</sub>)NH, and (CH<sub>3</sub>)<sub>2</sub>N) interacting with pyrene obtained at M06-2X/6-31G\* level of theory.

**Figure S5.** Geometric parameters of cationic, anionic, and radical substrates ((C<sub>6</sub>H<sub>5</sub>)NH, and (C<sub>6</sub>H<sub>5</sub>)<sub>2</sub>N) interacting with pyrene obtained at M06-2X/6-31G\* level of theory.

**Figure S6.** Geometric parameters of cationic, anionic, and radical substrates (OH, (CH<sub>3</sub>)O, and (C<sub>6</sub>H<sub>5</sub>)O) interacting with pyrene obtained at M06-2X/6-31G\* level of theory.

**Figure S7.** A schematic representation of pyrene and its geometrical parameters such as R<sub>1</sub> to R<sub>11</sub> and R'<sub>1</sub> to R'<sub>7</sub>. The site of interaction is encircled in red.

**Figure S8.** Correlation between the deformation energy (DE; kcal/mol) and FSC bond distance, SSC bond distance, and beyond SSC bond distance.

**Figure S9.** NCI map of the complexes obtained by the interaction of H and CH<sub>3</sub> in cationic, anionic, and radical states with pyrene at M06-2X/6-311G\*\* level of theory.

**Figure S10.** NCI map of the complexes obtained by the interaction of (CH<sub>3</sub>)CH<sub>2</sub>, (CH<sub>3</sub>)<sub>2</sub>CH, and (CH<sub>3</sub>)C in cationic, anionic, and radical states with pyrene at M06-2X/6-311G\*\* level of theory.

**Figure S11.** NCI map of the complexes obtained by the interaction of (C<sub>6</sub>H<sub>5</sub>)CH<sub>2</sub>, (C<sub>6</sub>H<sub>5</sub>)<sub>2</sub>CH, and (C<sub>6</sub>H<sub>5</sub>)C in cationic, anionic, and radical states with pyrene at M06-2X/6-311G\*\* level of theory.

**Figure S12.** NCI map of the complexes obtained by the interaction of NH<sub>2</sub>, (CH<sub>3</sub>)NH, and (CH<sub>3</sub>)<sub>2</sub>N in cationic, anionic, and radical states with pyrene at M06-2X/6-311G\*\* level of theory.

**Figure S13.** NCI map of the complexes obtained by the interaction of (C<sub>6</sub>H<sub>5</sub>)NH, and (C<sub>6</sub>H<sub>5</sub>)<sub>2</sub>N in cationic, anionic, and radical states with pyrene at M06-2X/6-311G\*\* level of theory.

**Figure S14.** NCI map of the complexes obtained by the interaction of OH, (CH<sub>3</sub>)O, and (C<sub>6</sub>H<sub>5</sub>)O in cationic, anionic, and radical states with pyrene at M06-2X/6-311G\*\* level of theory.

**Table S1:** Different methods used for the benchmark study of the interactions between pyrene (C<sub>16</sub>H<sub>10</sub>) with cationic, anionic, and radical substrates.

**Table S2(A):** Benchmarking of the geometrical parameters of pyrene-H complexes in cationic, anionic, and radical states at different levels of theories. Values are given in Å.

**Table S2(B):** Benchmarking of the geometrical parameters of pyrene-CH<sub>3</sub> complexes in cationic, anionic, and radical states at different levels of theories. Values are given in Å.

**Table S2(C):** Benchmarking of the geometrical parameters of pyrene-(CH<sub>3</sub>)<sub>3</sub>C complexes in cationic, anionic, and radical states at different levels of theories. Values are given in Å.

**Table S3(A):** The geometrical parameters for cationic substrates interacting pyrene obtained at M06-2X/6-31G\* level of theory.

**Table S3(B):** The geometrical parameters for anionic substrates interacting pyrene obtained at M06-2X/6-31G\* level of theory.

**Table S3(C):** The geometrical parameters for radical substrates interacting with pyrene obtained at M06-2X/6-31G\* level of theory.

**Table S4(A):** Benchmarking of the interaction energies (IE; kcal/mol) of pyrene-H complexes in cationic, anionic, and radical states at different levels of theories. The value obtained at M06-2X/6-311G\*\*//M06-2X/6-31G\* level of theory is considered as a reference (energy zero) to calculate the absolute relative energy (RE; kcal/mol).

**Table S4(B):** Benchmarking of the interaction energies (kcal/mol) of pyrene-CH<sub>3</sub> complexes in cationic, anionic, and radical states at different levels of theories. The value obtained at M06-2X/6-311G\*\*//M06-2X/6-31G\* level of theory is considered as a reference (energy zero) to calculate the absolute relative energy (RE; kcal/mol).

**Table S4(C):** Benchmarking of the interaction energies (kcal/mol) of pyrene-(CH<sub>3</sub>)<sub>3</sub>C complexes in cationic, anionic, and radical states at different levels of theories. The value obtained at M06-2X/6-311G\*\*//M06-2X/6-31G\* level of theory is considered as a reference (energy zero) to calculate the absolute relative energy (RE; kcal/mol).

**Table S5(A).** Contribution of each energy component into the interaction energy (IE; kcal/mol) of cationic substrates-pyrene complexes obtained using LMOEDA scheme at M06-2X/6-311G\*\* level of theory.

**Table S5(B).** Contribution of each energy component into the interaction energy (IE; kcal/mol) of anionic substrates-pyrene complexes obtained using LMOEDA scheme at M06-2X/6-311G\*\* level of theory.

**Table S5(C).** Contribution of each energy component into the interaction energy (IE; kcal/mol) of cationic radical-pyrene complexes obtained using LMOEDA scheme at M06-2X/6-311G\*\* level of theory.

**Table S6(A).** Percentage contribution of each energy component into the interaction energy of cationic substrates-pyrene complexes obtained using LMOEDA scheme at M06-2X/6-311G\*\* level of theory.

**Table S6(B).** Percentage contribution of each energy component into the interaction energy of anionic substrates-pyrene complexes obtained using LMOEDA scheme at M06-2X/6-311G\*\* level of theory.

**Table S6(C).** Percentage contribution of each energy component into the interaction energy of cationic substrates-pyrene complexes obtained using LMOEDA scheme at M06-2X/6-311G\*\* level of theory.

**Table S7(A):** The variation of electron density ( $\rho$ ), Laplacian of electron density ( $\nabla^2\rho$ ), total energy density ( $H(\mathbf{r})$ ), and the ratio of kinetic energy density  $G(\mathbf{r})$ , and potential energy density  $V(\mathbf{r})$ , ( $-[G(\mathbf{r})/V(\mathbf{r})]$ ) obtained at bond critical points for cationic substrates with pyrene.

**Table S7(B):** The variation of electron density ( $\rho$ ), Laplacian of electron density ( $\nabla^2\rho$ ), total energy density ( $H(\mathbf{r})$ ), and the ratio of kinetic energy density  $G(\mathbf{r})$ , and potential energy density  $V(\mathbf{r})$ , ( $-[G(\mathbf{r})/V(\mathbf{r})]$ ) obtained at bond critical points for anionic substrates with pyrene.

**Table S7(C):** The variation of electron density ( $\rho$ ), Laplacian of electron density ( $\nabla^2\rho$ ), total energy density ( $H(\mathbf{r})$ ), and the ratio of kinetic energy density  $G(\mathbf{r})$ , and potential energy density  $V(\mathbf{r})$ , ( $-[G(\mathbf{r})/V(\mathbf{r})]$ ) obtained at bond critical points for radical substrates with pyrene.

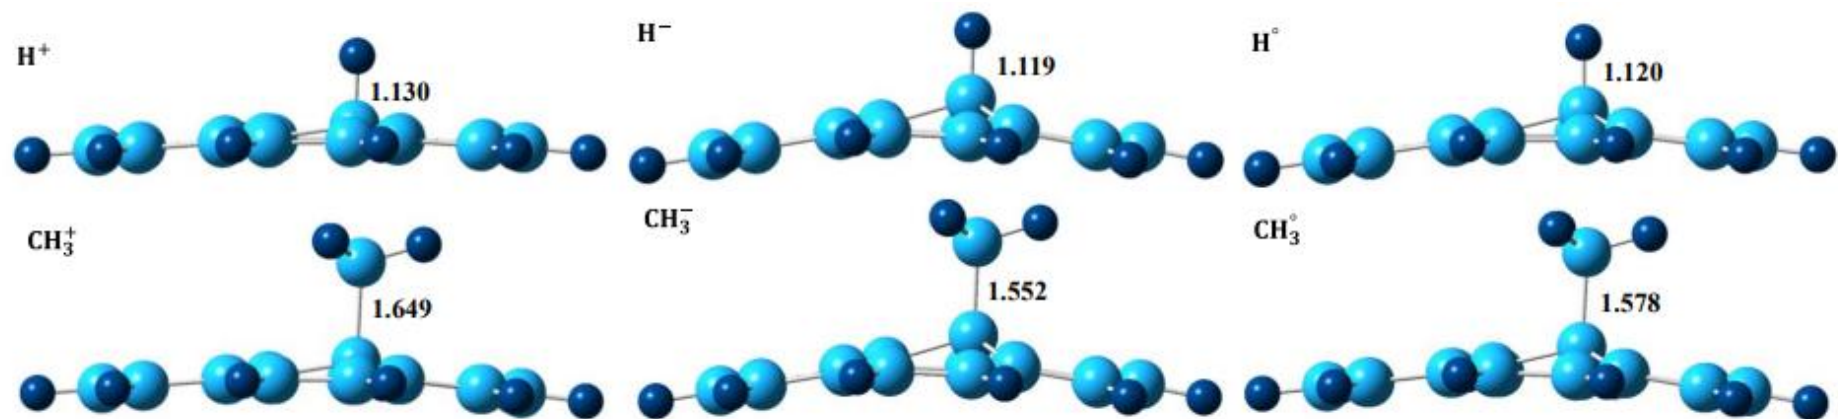

**Figure S1.** Geometric parameters of cationic, anionic, and radical substrates (H and CH<sub>3</sub>) interacting with pyrene obtained at M06-2X/6-31G\* level of theory.

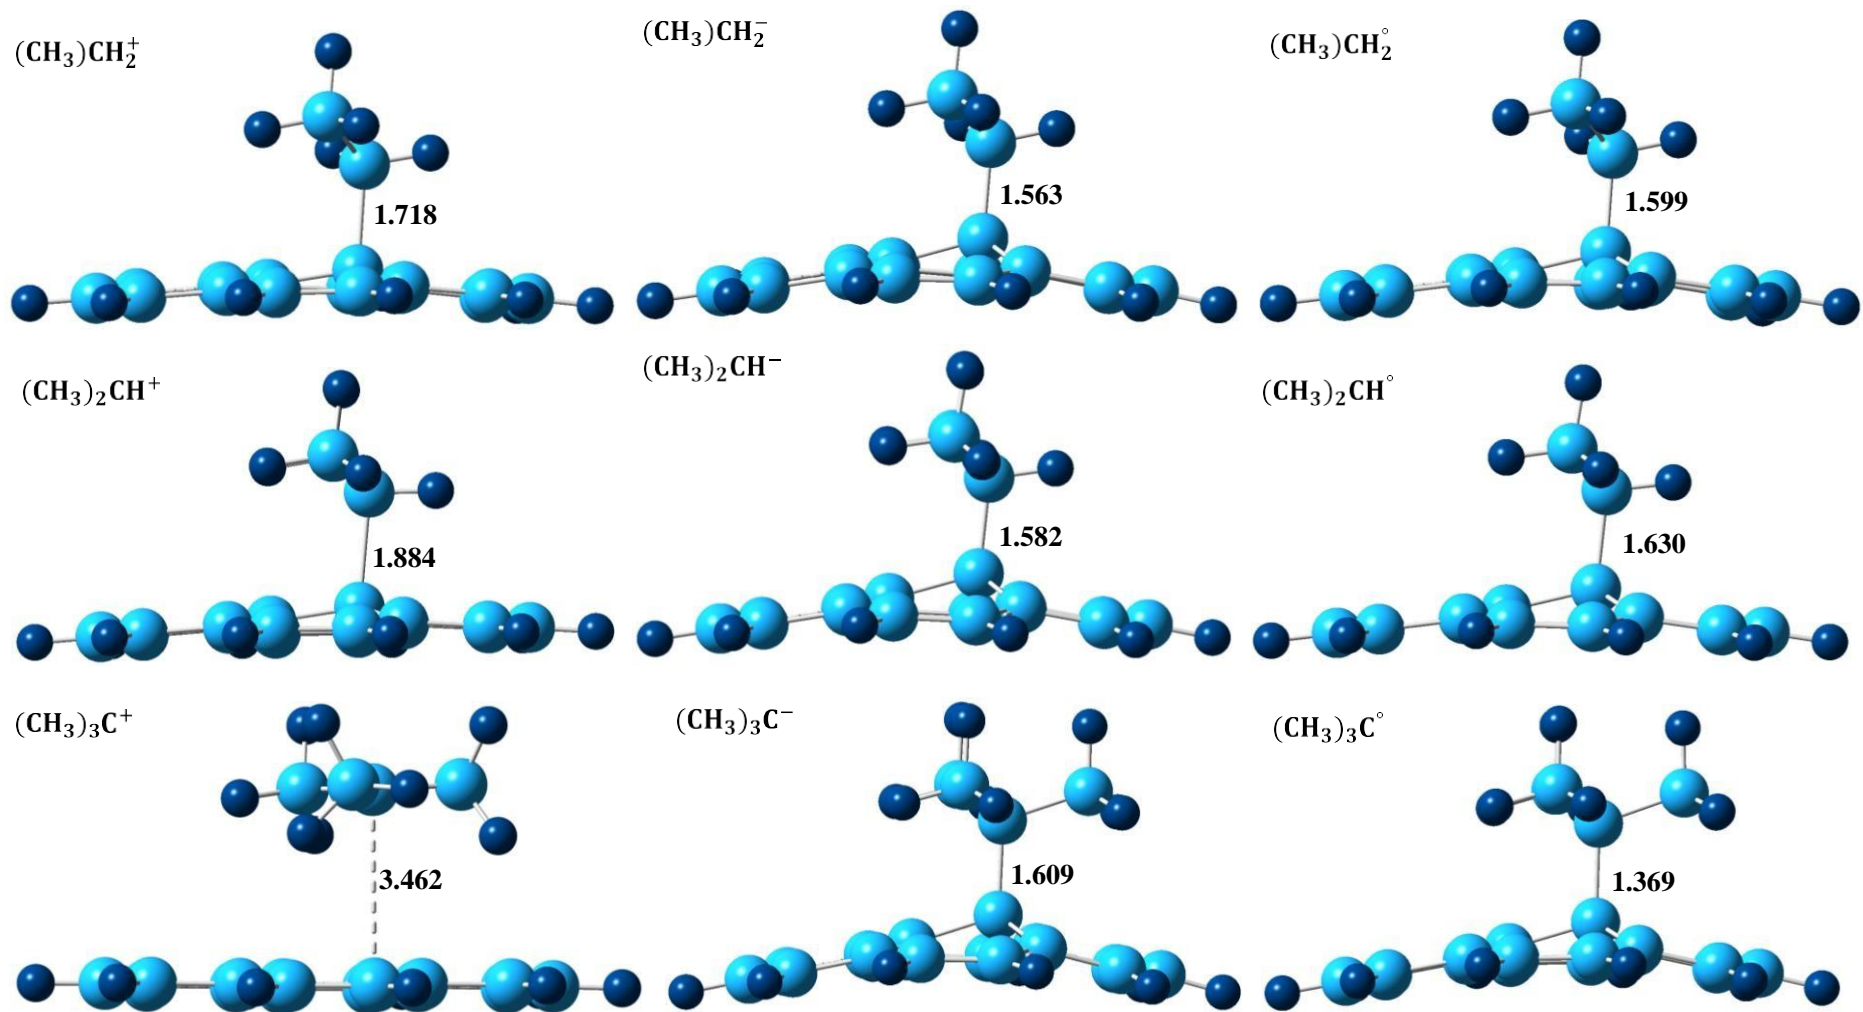

**Figure S2.** Geometric parameters of cationic, anionic, and radical substrates ( $(\text{CH}_3)\text{CH}_2$ ,  $(\text{CH}_3)_2\text{CH}$ , and  $(\text{CH}_3)_3\text{C}$ ) interacting with pyrene obtained at M06-2X/6-31G\* level of theory.

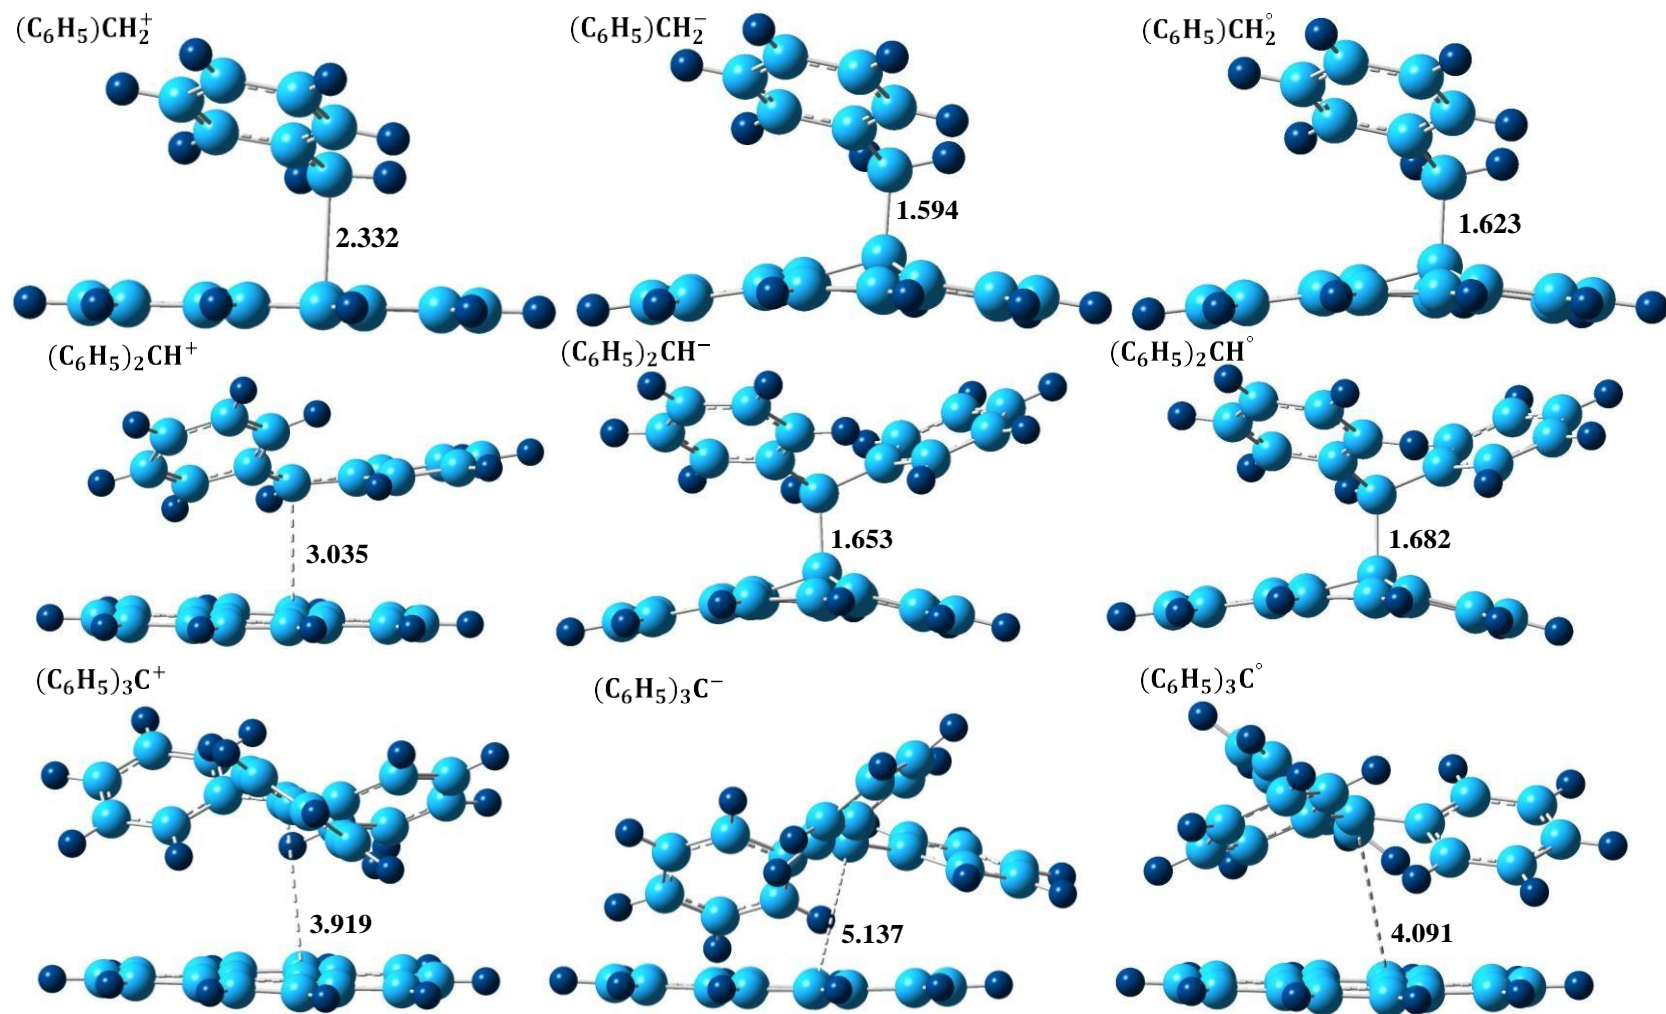

**Figure S3.** Geometric parameters of cationic, anionic, and radical substrates ( $(\text{C}_6\text{H}_5)\text{CH}_2$ ,  $(\text{C}_6\text{H}_5)_2\text{CH}$ , and  $(\text{C}_6\text{H}_5)_3\text{C}$ ) interacting with pyrene obtained at M06-2X/6-31G\* level of theory.



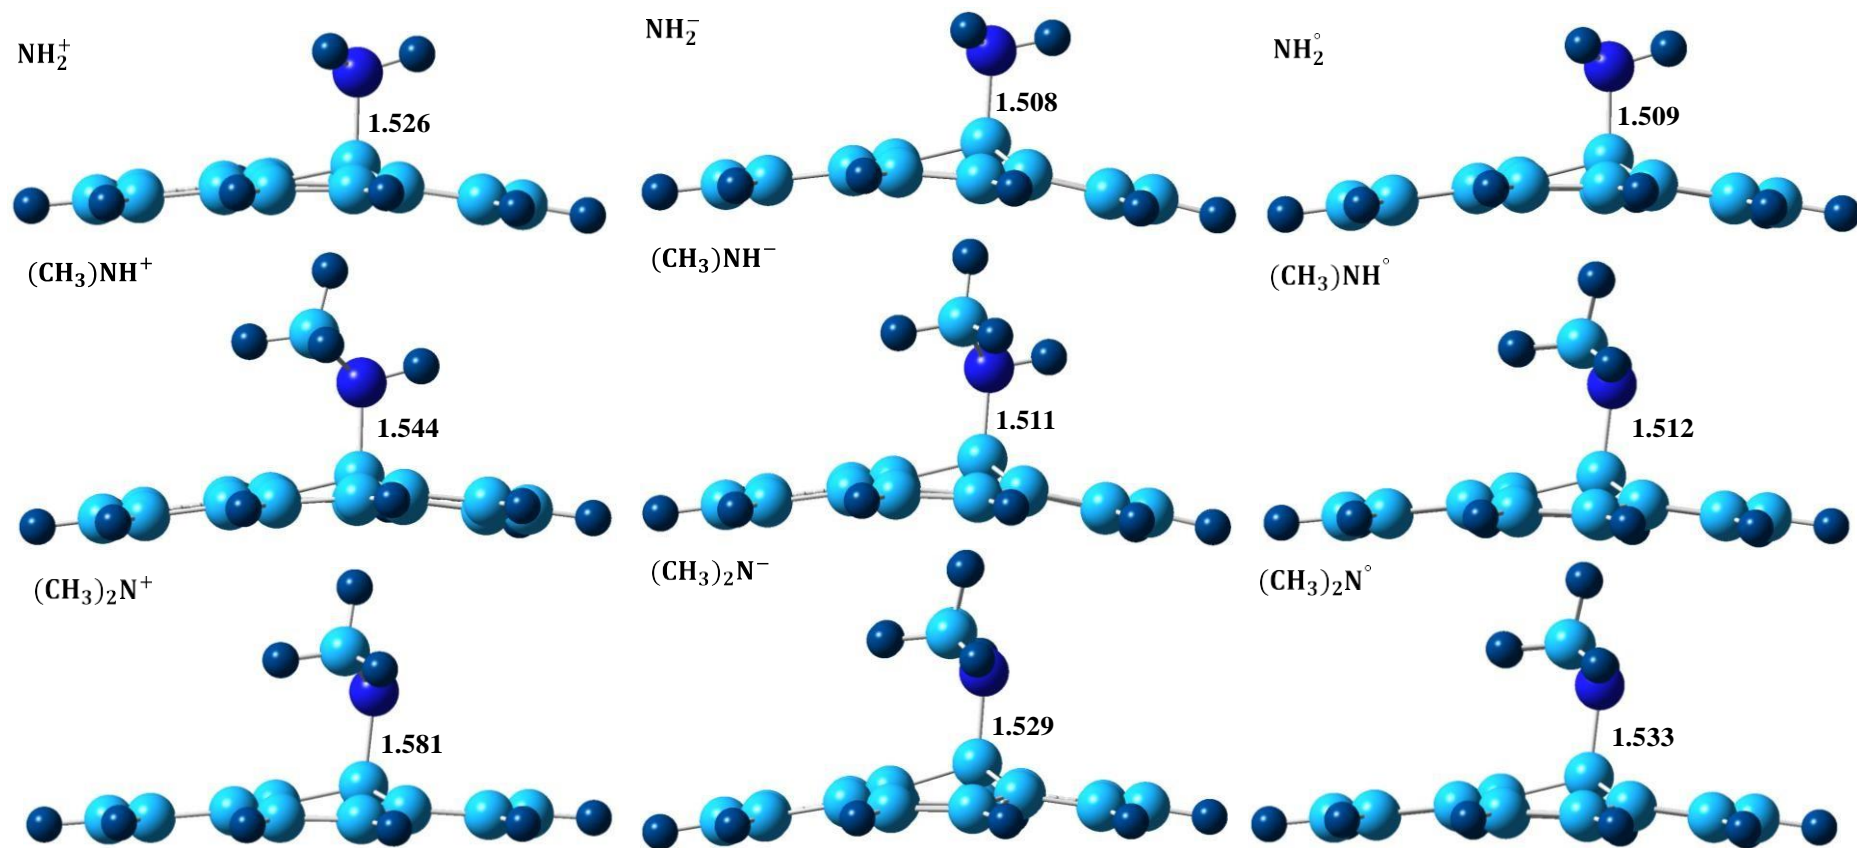

**Figure S4.** Geometric parameters of cationic, anionic, and radical substrates ( $\text{NH}_2$ ,  $(\text{CH}_3)\text{NH}$ , and  $(\text{CH}_3)_2\text{N}$ ) interacting with pyrene obtained at M06-2X/6-31G\* level of theory.

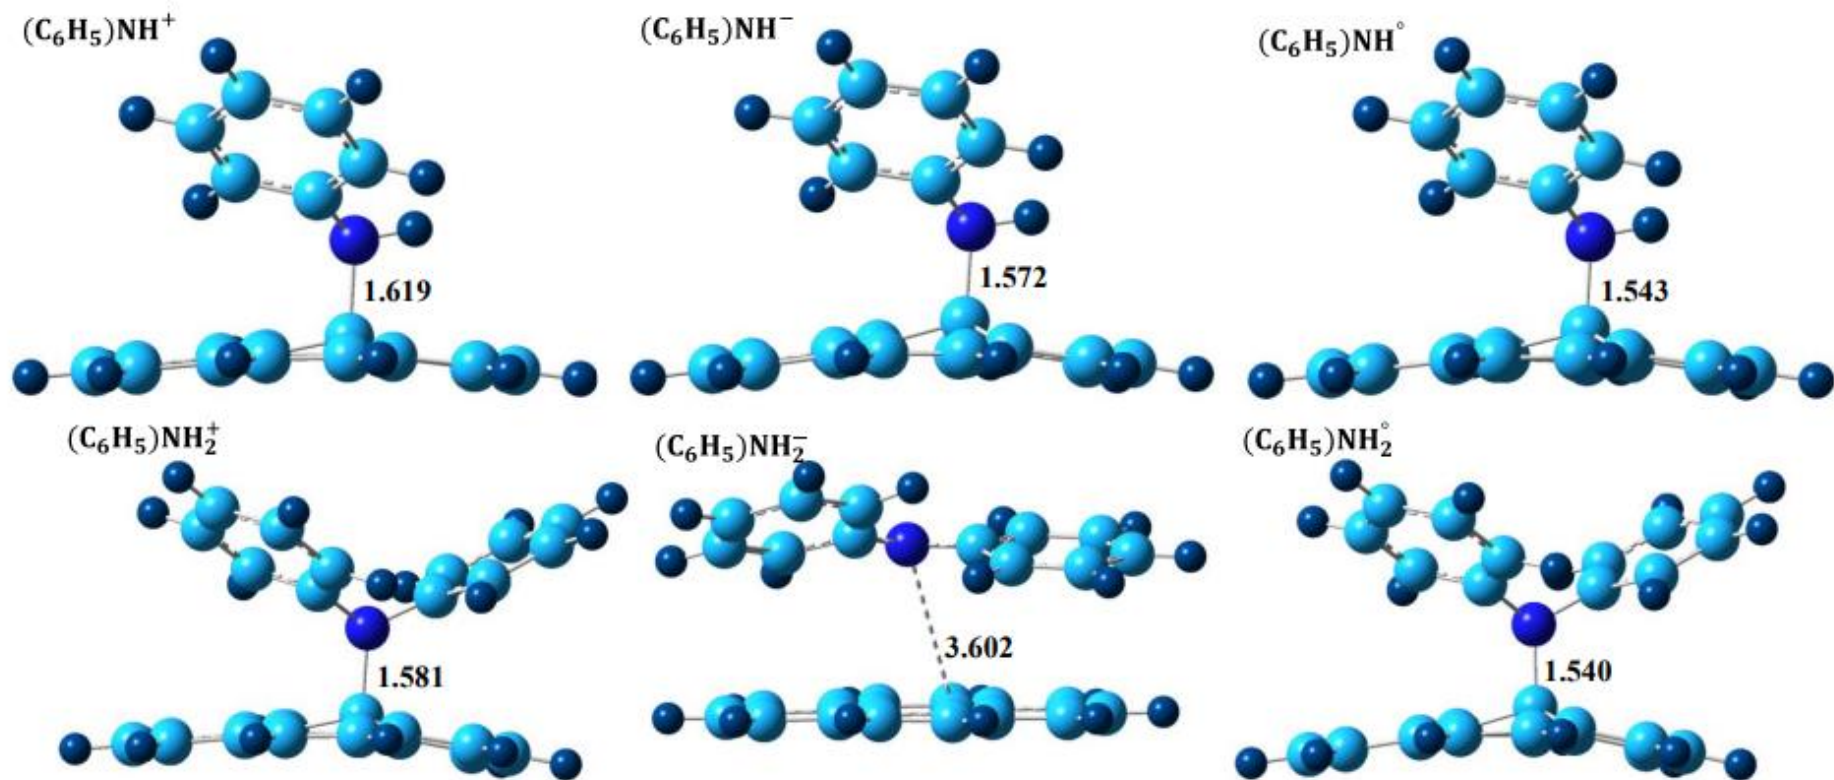

**Figure S5.** Geometric parameters of cationic, anionic, and radical substrates ( $(C_6H_5)NH$ , and  $(C_6H_5)_2N$ ) interacting with pyrene obtained at M06-2X/6-31G\* level of theory.



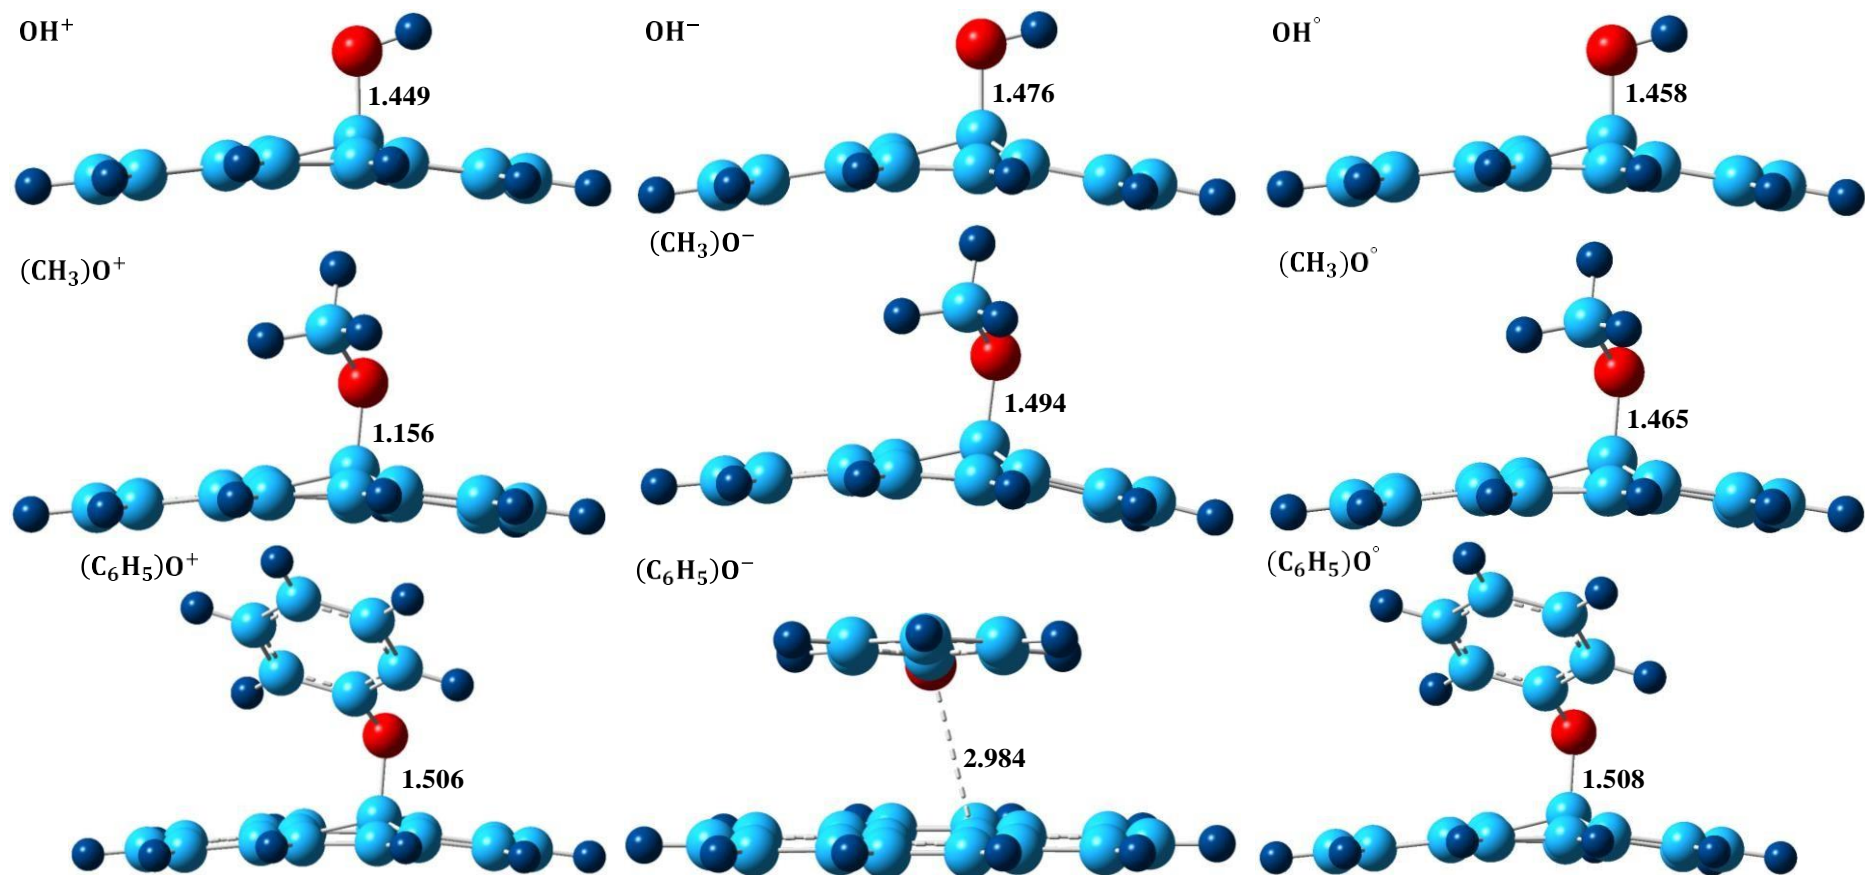

**Figure S6.** Geometric parameters of cationic, anionic, and radical substrates (OH, (CH<sub>3</sub>)O, and (C<sub>6</sub>H<sub>5</sub>)O) interacting with pyrene obtained at M06-2X/6-31G\* level of theory.

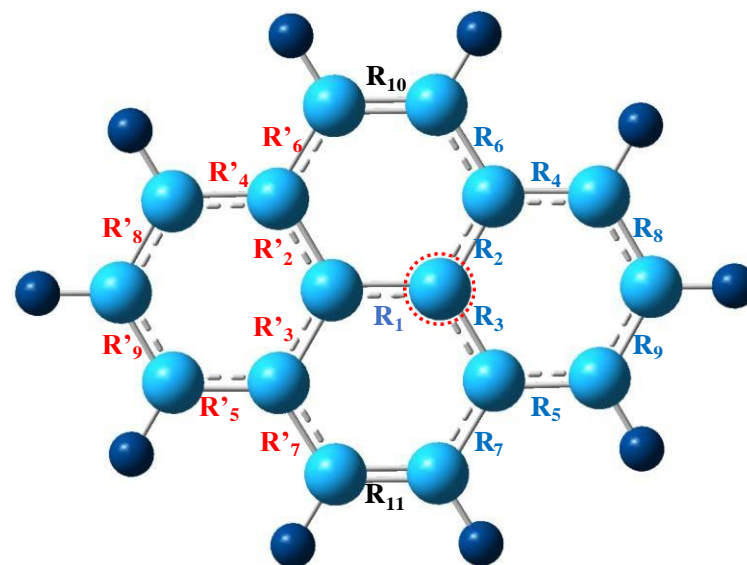

**Figure S7.** A schematic representation of pyrene and its geometrical parameters such as R<sub>1</sub> to R<sub>11</sub> and R'<sub>1</sub> to R'<sub>7</sub>. The site of interaction is encircled in red.

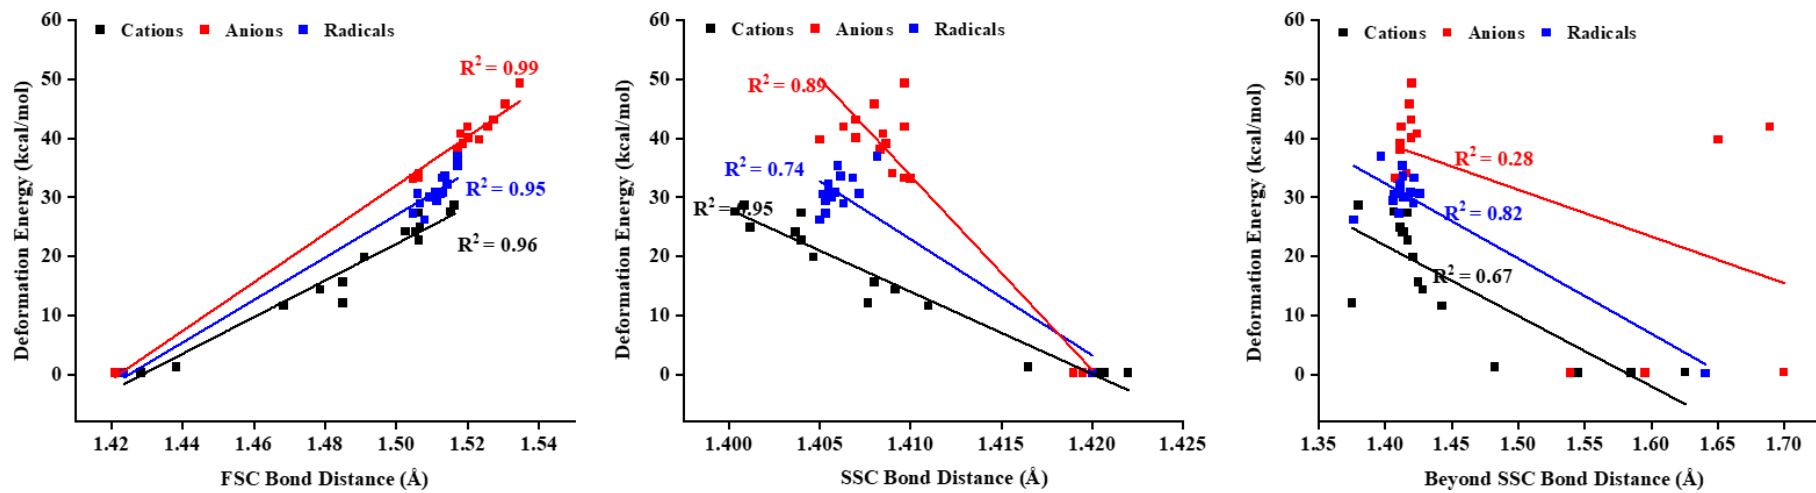

**Figure S8.** Correlation between the deformation energy (DE; kcal/mol) and FSC bond distance, SSC bond distance, and beyond SSC bond distance.

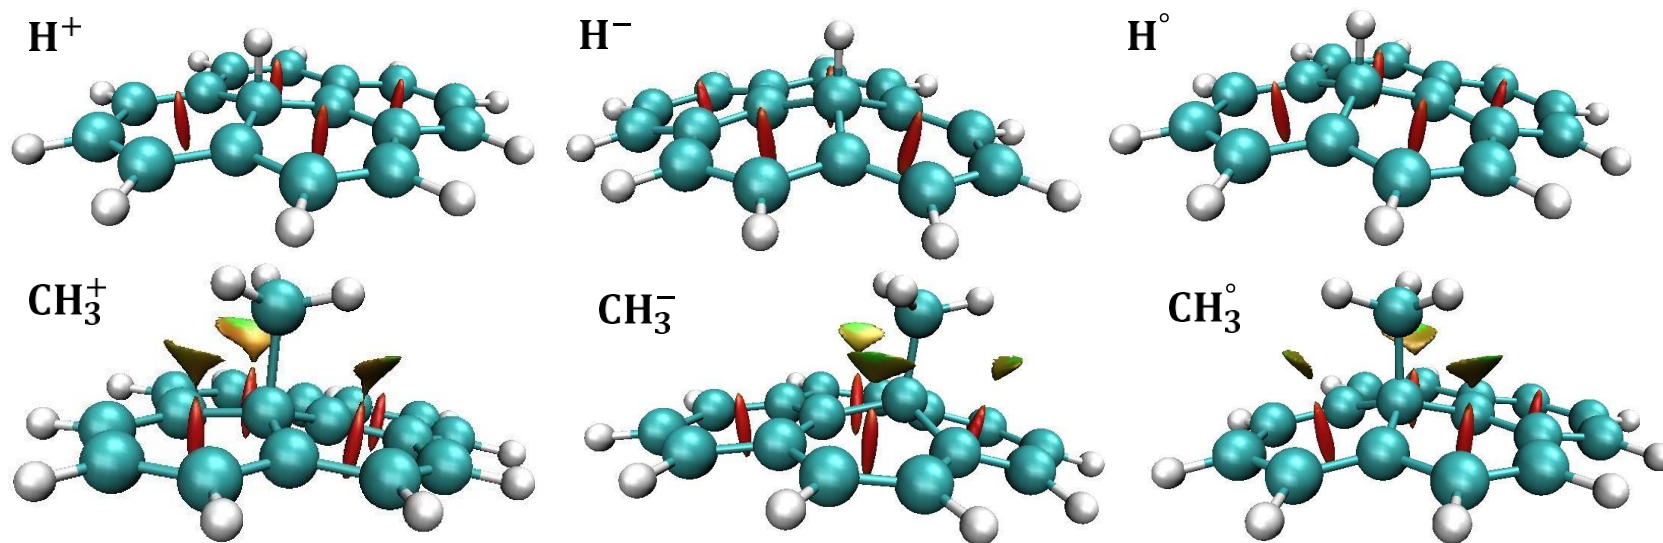

**Figure S9.** NCI map of the complexes obtained by the interaction of H and  $CH_3$  in cationic, anionic, and radical states with pyrene at M06-2X/6-311G\*\* level of theory.

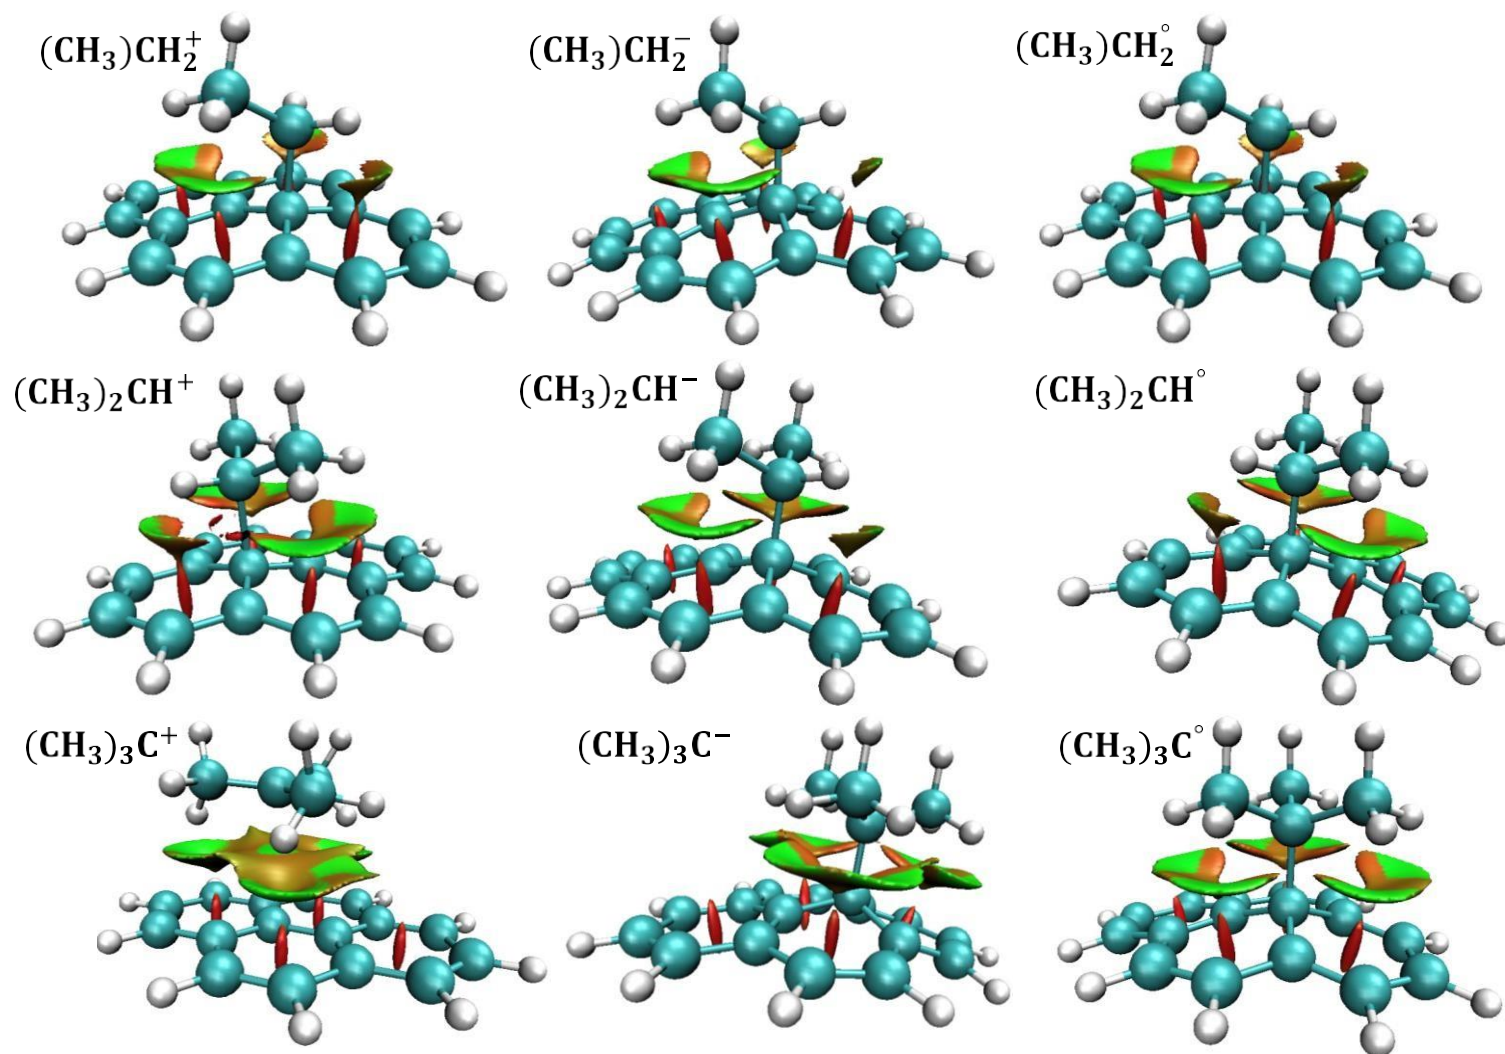

**Figure S10.** NCI map of the complexes obtained by the interaction of  $(\text{CH}_3)\text{CH}_2$ ,  $(\text{CH}_3)_2\text{CH}$ , and  $(\text{CH}_3)\text{C}$  in cationic, anionic, and radical states with pyrene at M06-2X/6-311G\*\* level of theory.



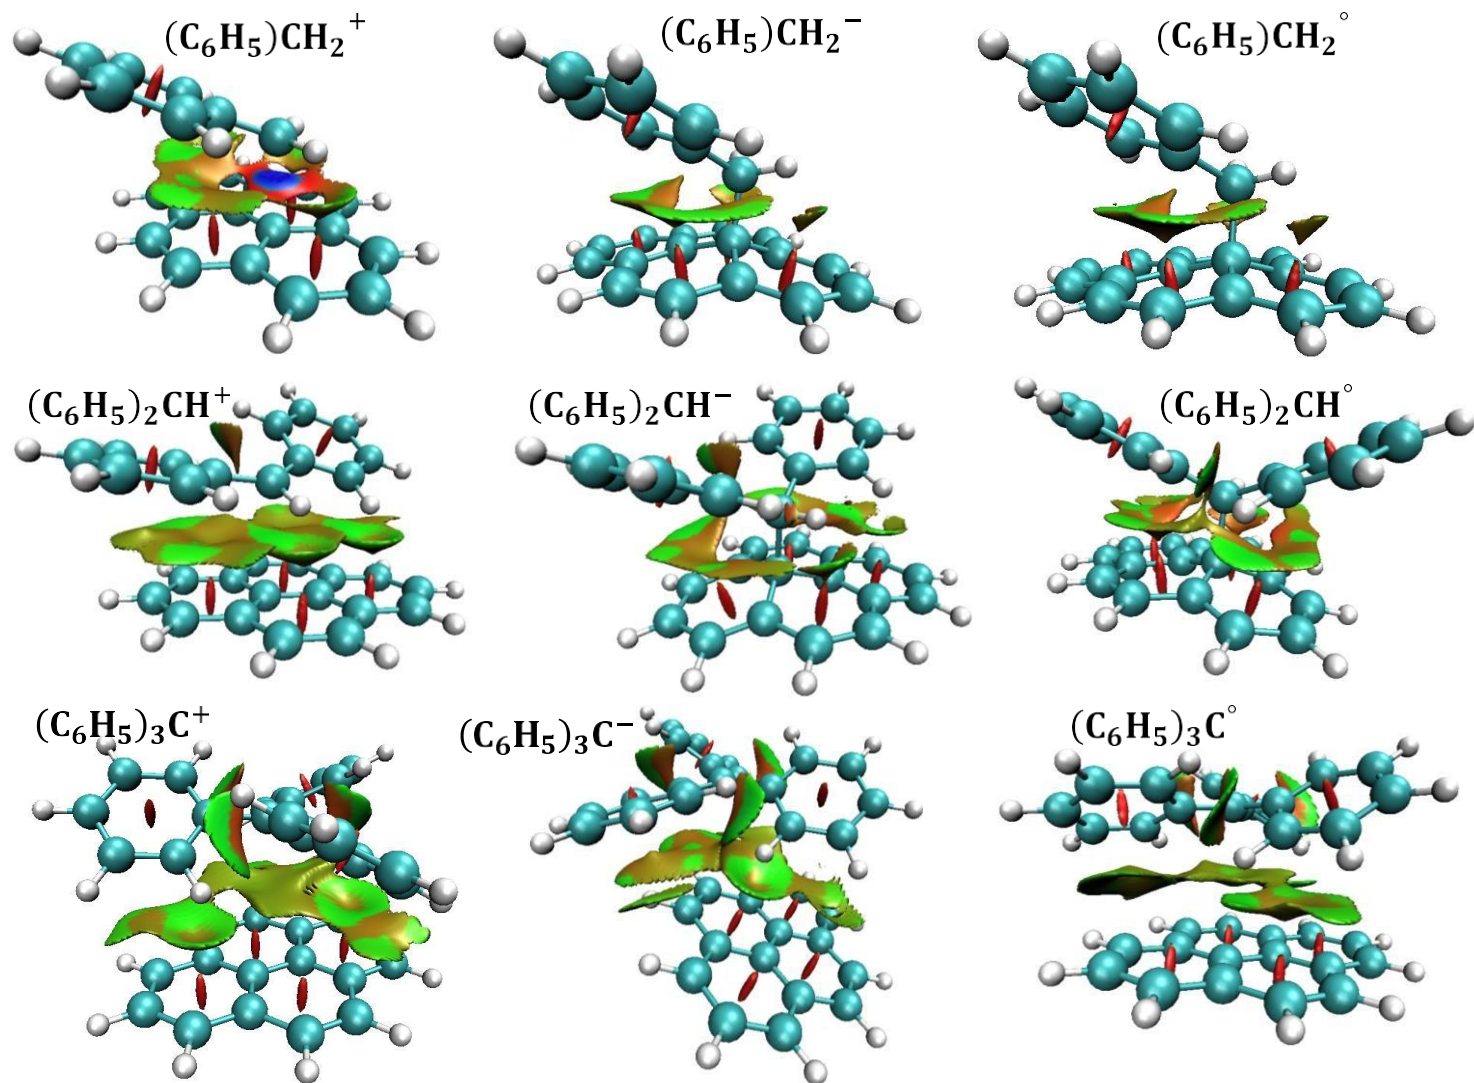

**Figure S11.** NCI map of the complexes obtained by the interaction of  $(\text{C}_6\text{H}_5)\text{CH}_2$ ,  $(\text{C}_6\text{H}_5)_2\text{CH}$ , and  $(\text{C}_6\text{H}_5)_3\text{C}$  in cationic, anionic, and radical states with pyrene at M06-2X/6-311G\*\* level of theory.



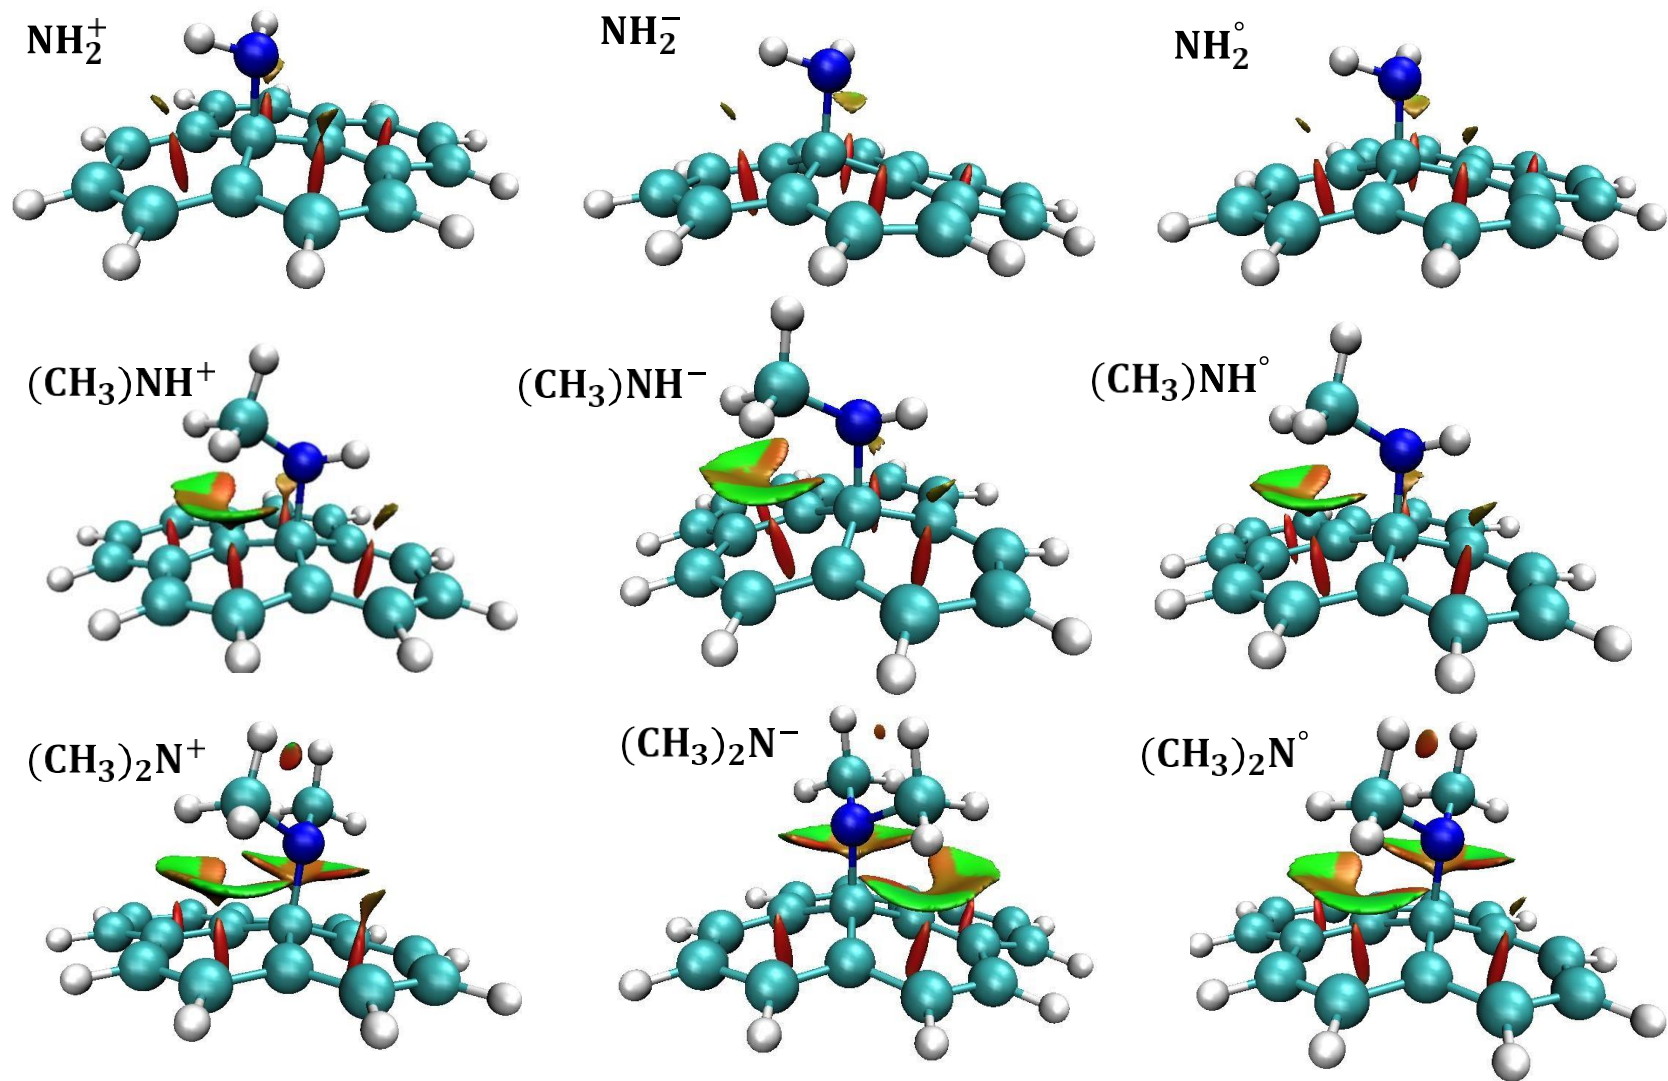

**Figure S12.** NCI map of the complexes obtained by the interaction of  $\text{NH}_2$ ,  $(\text{CH}_3)\text{NH}$ , and  $(\text{CH}_3)_2\text{N}$  in cationic, anionic, and radical states with pyrene at M06-2X/6-311G\*\* level of theory.

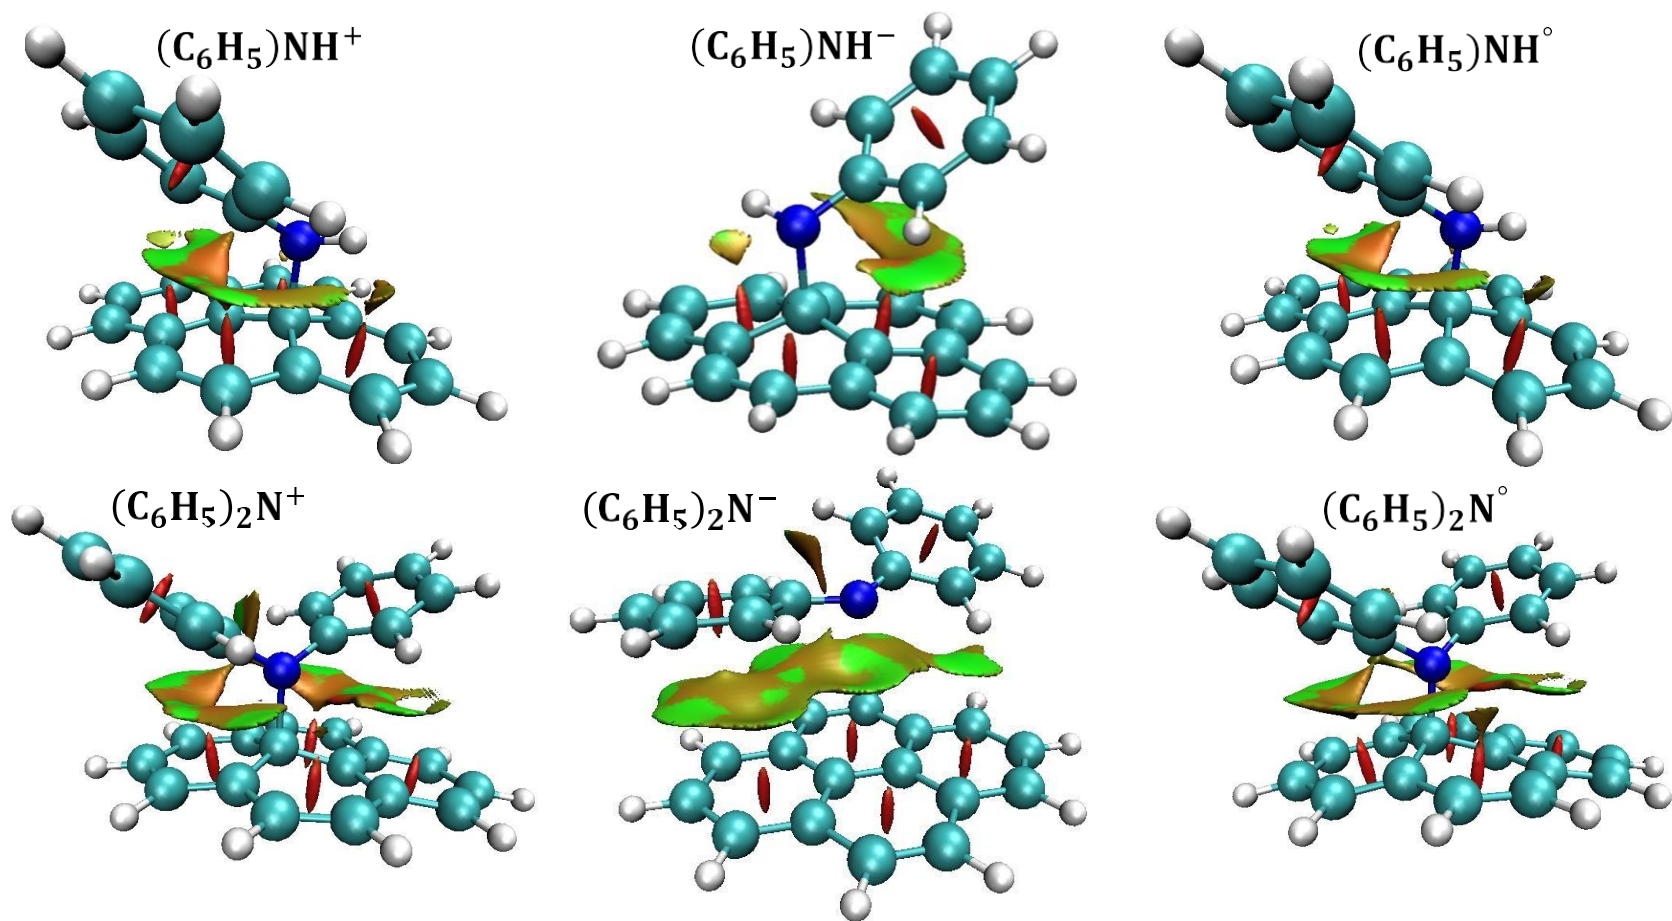

**Figure S13.** NCI map of the complexes obtained by the interaction of  $(\text{C}_6\text{H}_5)\text{NH}$ , and  $(\text{C}_6\text{H}_5)_2\text{N}$  in cationic, anionic, and radical states with pyrene at M06-2X/6-311G\*\* level of theory.

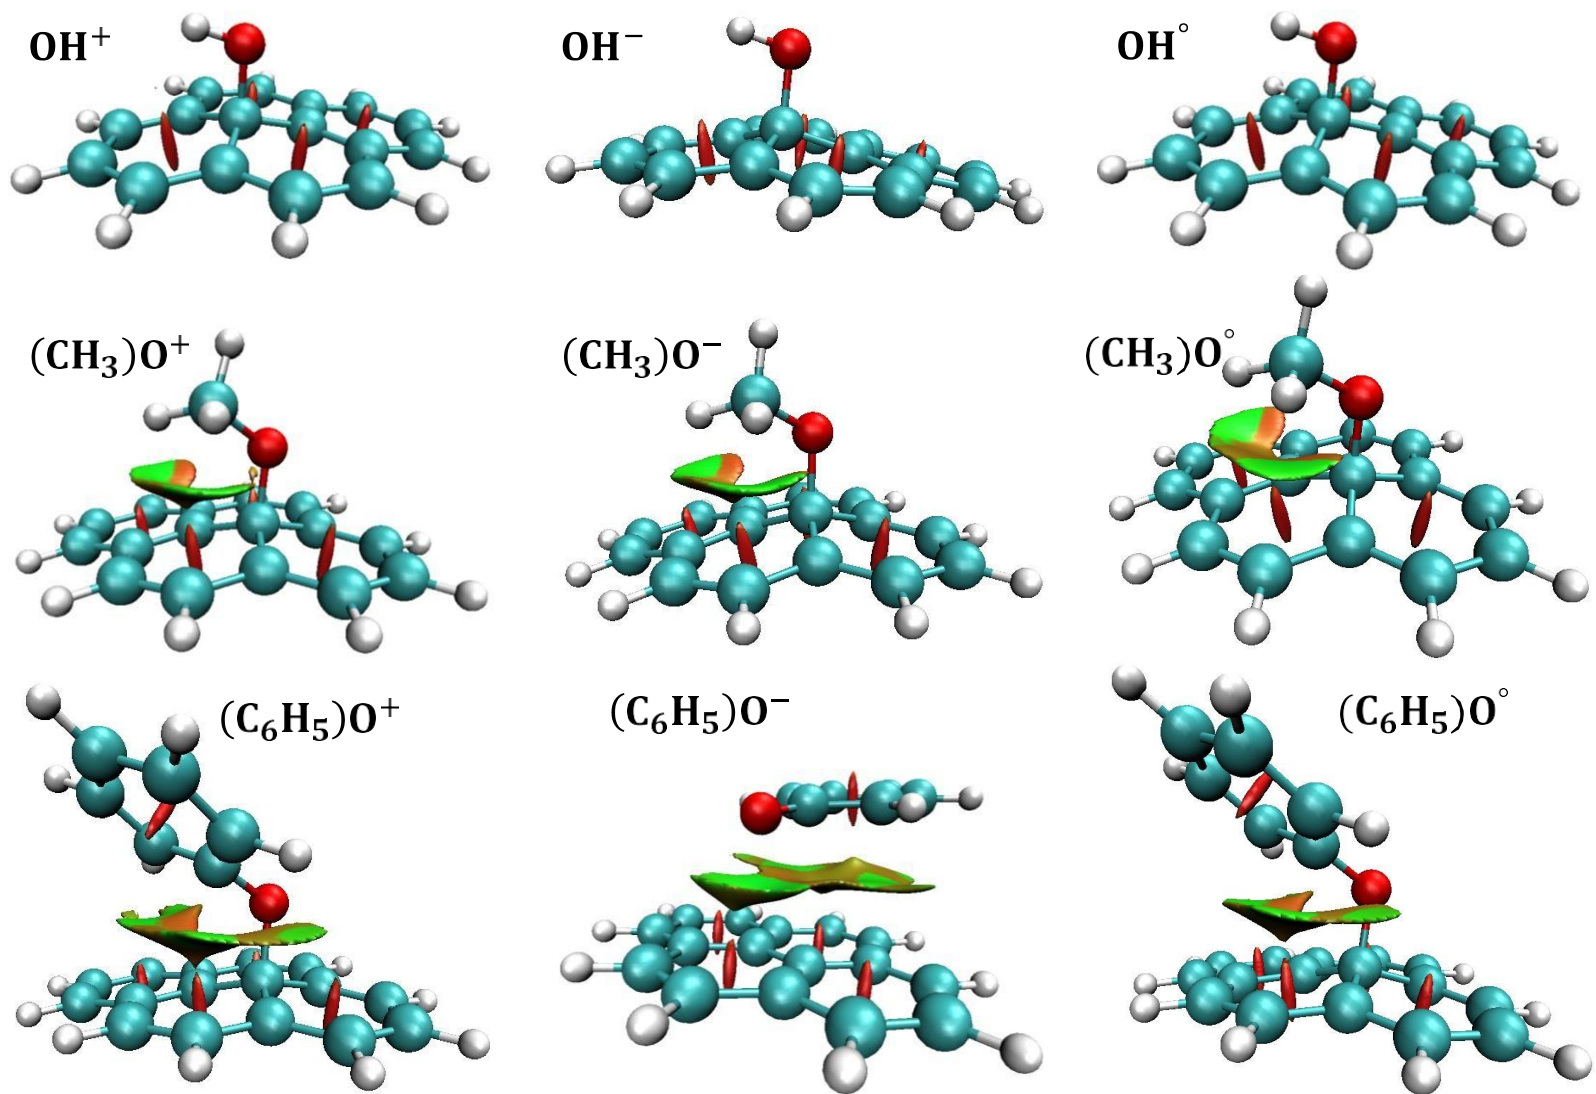

**Figure S14.** NCI map of the complexes obtained by the interaction of OH, (CH<sub>3</sub>)O, and (C<sub>6</sub>H<sub>5</sub>)O in cationic, anionic, and radical states with pyrene at M06-2X/6-311G\*\* level of theory.

**Table S1:** Different methods used for the benchmark study of the interactions between pyrene (C<sub>16</sub>H<sub>10</sub>) with cationic, anionic, and radical substrates.

| Method   | Description                                                                                 | Reference |
|----------|---------------------------------------------------------------------------------------------|-----------|
| HF       | Wave Function Based Method                                                                  | a         |
| MP2      | Post HF Wave Function Based Method                                                          | b         |
| BP86     | GGA Density Functional Method                                                               | c, d      |
| B3LYP    | Hybrid-GGA Density Functional Method                                                        | e, f      |
| M06      | Hybrid Meta-GGA Density Functional Method                                                   | g, h      |
| camB3LYP | Range-Separated Hybrid Density Functional Method                                            | i         |
| B3LYP-D3 | Hybrid-GGA Density Functional Method<br>with Grimme's Empirical Dispersion Corrections (D3) | j         |

### References:

- a. The Wave Mechanics of an Atom with a Non-Coulomb Central Field. Part II. Some Results and Discussion by D. R. Hartree, *Mathematical Proceedings of the Cambridge Philosophical Society*, Volume 24, 111–132, January 1928.
- b. The Wave Mechanics of an Atom with a Non-Coulomb Central Field. Part II. Some Results and Discussion by D. R. Hartree, *Mathematical Proceedings of the Cambridge Philosophical Society*, Volume 24, 111–132, January 1928.
- c. Becke, A. D. Density-functional exchange-energy approximation with correct asymptotic behavior. *Phys. Rev. A* 1988, 38, 3098– 3100.
- d. Perdew, J. P. Density-functional approximation for the correlation energy of the inhomogeneous electron gas. *Phys. Rev. B* 1986, 33, 8822.
- e. Becke, A. D. Density-functional thermochemistry. I. The effect of the exchange-only gradient correction. *J. Chem. Phys.* 1992, 96, 2155– 2160.
- f. Lee, C.; Yang, W.; Parr, R. G. Development of the Colle-Salvetti correlation-energy formula into a functional of the electron density. *Phys. Rev. B* 1988, 37, 785.
- g. Zhao, Y.; Truhlar, D. G. A new local density functional for main-group thermochemistry, transition metal bonding, thermochemical kinetics, and noncovalent interactions. *J. Chem. Phys.* 2006, 125, 194101.
- h. Zhao, Y.; Truhlar, D. G. The M06 suite of density functionals for main group thermochemistry, thermochemical kinetics, noncovalent interactions, excited states, and transition elements: two new functionals and systematic testing of four M06-class functionals and 12 other functionals. *Theoretical chemistry accounts* 2008, 120, 215– 241.
- i. Yanai, T.; Tew, D. P.; Handy, N. C. A new hybrid exchange–correlation functional using the Coulomb-attenuating method (CAM-B3LYP). *Chemical physics letters* 2004, 393, 51– 57.
- j. Grimme S, Antony J, Ehrlich S, Krieg H. A consistent and accurate ab initio parametrization of density functional dispersion correction (DFT-D) for the 94 elements H-Pu. *J Chem Phys.* 2010 Apr 21;132(15):154104.

**Table S2(A):** Benchmarking of the geometrical parameters of pyrene-H complexes in cationic, anionic, and radical states at different levels of theories. Values are given in Å.

| Methods              | Cation         |                |                |                | Anion          |                |                |                | Radical        |                |                |                |
|----------------------|----------------|----------------|----------------|----------------|----------------|----------------|----------------|----------------|----------------|----------------|----------------|----------------|
|                      | R <sub>0</sub> | R <sub>1</sub> | R <sub>2</sub> | R <sub>3</sub> | R <sub>0</sub> | R <sub>1</sub> | R <sub>2</sub> | R <sub>3</sub> | R <sub>0</sub> | R <sub>1</sub> | R <sub>2</sub> | R <sub>3</sub> |
| <i>M06-2X/6-31G*</i> | 1.130          | 1.485          | 1.485          | 1.485          | 1.119          | 1.522          | 1.524          | 1.524          | 1.120          | 1.508          | 1.508          | 1.508          |
| camB3LYP/6-31G*      | 1.125          | 1.486          | 1.486          | 1.486          | 1.120          | 1.522          | 1.523          | 1.523          | 1.118          | 1.508          | 1.509          | 1.509          |
| camB3LYP/6-311G**    | 1.126          | 1.483          | 1.482          | 1.482          | 1.119          | 1.519          | 1.521          | 1.521          | 1.117          | 1.506          | 1.506          | 1.506          |
| camB3LYP/6-311+G**   | 1.126          | 1.483          | 1.482          | 1.482          | 1.121          | 1.517          | 1.519          | 1.519          | 1.117          | 1.506          | 1.506          | 1.506          |
| B3LYP/6-31G*         | 1.126          | 1.491          | 1.496          | 1.496          | 1.123          | 1.527          | 1.532          | 1.532          | 1.121          | 1.512          | 1.517          | 1.517          |
| B3LYP/6-311G**       | 1.126          | 1.488          | 1.492          | 1.492          | 1.121          | 1.525          | 1.530          | 1.530          | 1.119          | 1.510          | 1.514          | 1.514          |
| B3LYP/6-311+G**      | 1.126          | 1.488          | 1.492          | 1.492          | 1.123          | 1.523          | 1.528          | 1.528          | 1.120          | 1.510          | 1.514          | 1.514          |
| BP86/6-31G*          | 1.135          | 1.495          | 1.502          | 1.502          | 1.132          | 1.532          | 1.539          | 1.539          | 1.132          | 1.516          | 1.522          | 1.522          |
| BP86/6-311G**        | 1.135          | 1.491          | 1.498          | 1.498          | 1.130          | 1.530          | 1.536          | 1.536          | 1.130          | 1.514          | 1.520          | 1.520          |
| BP86/6-311+G**       | 1.136          | 1.491          | 1.498          | 1.498          | 1.131          | 1.528          | 1.535          | 1.535          | 1.131          | 1.513          | 1.519          | 1.519          |
| M06/6-31G*           | 1.128          | 1.482          | 1.485          | 1.485          | 1.126          | 1.517          | 1.521          | 1.521          | 1.123          | 1.503          | 1.506          | 1.506          |
| M06/6-311G**         | 1.129          | 1.478          | 1.481          | 1.481          | 1.126          | 1.514          | 1.517          | 1.517          | 1.123          | 1.501          | 1.503          | 1.503          |
| M06/6-311+G**        | 1.130          | 1.478          | 1.481          | 1.481          | 1.127          | 1.512          | 1.516          | 1.516          | 1.124          | 1.500          | 1.503          | 1.503          |
| B3LYP-D3/6-31G*      | 1.125          | 1.490          | 1.495          | 1.495          | 1.122          | 1.526          | 1.532          | 1.532          | 1.120          | 1.512          | 1.516          | 1.516          |
| B3LYP-D3/6-311G**    | 1.125          | 1.487          | 1.492          | 1.492          | 1.120          | 1.524          | 1.529          | 1.529          | 1.119          | 1.510          | 1.514          | 1.514          |
| B3LYP-D3/6-311+G**   | 1.126          | 1.487          | 1.491          | 1.491          | 1.122          | 1.522          | 1.528          | 1.528          | 1.120          | 1.509          | 1.513          | 1.513          |
| HF/6-31G*            | 1.112          | 1.495          | 1.488          | 1.488          | 1.108          | 1.524          | 1.521          | 1.521          | 1.101          | 1.513          | 1.516          | 1.516          |
| HF/6-311G**          | 1.113          | 1.492          | 1.486          | 1.486          | 1.110          | 1.521          | 1.519          | 1.519          | 1.102          | 1.511          | 1.515          | 1.515          |
| HF/6-311+G**         | 1.114          | 1.492          | 1.485          | 1.485          | 1.112          | 1.520          | 1.517          | 1.517          | 1.103          | 1.511          | 1.514          | 1.514          |
| MP2/6-31G*           | 1.132          | 1.478          | 1.481          | 1.481          | 1.122          | 1.518          | 1.525          | 1.525          | 1.118          | 1.508          | 1.507          | 1.507          |
| MP2/6-311G**         | 1.136          | 1.477          | 1.482          | 1.482          | 1.124          | 1.518          | 1.525          | 1.525          | 1.118          | 1.509          | 1.507          | 1.507          |
| MP2/6-311+G**        | 1.137          | 1.478          | 1.482          | 1.482          | 1.128          | 1.516          | 1.522          | 1.522          | 1.119          | 1.509          | 1.507          | 1.506          |

**Table S2(B):** Benchmarking of the geometrical parameters of pyrene-CH<sub>3</sub> complexes in cationic, anionic, and radical states at different levels of theories. Values are given in Å.

| Methods              | Cation         |                |                |                | Anion          |                |                |                | Radical        |                |                |                |
|----------------------|----------------|----------------|----------------|----------------|----------------|----------------|----------------|----------------|----------------|----------------|----------------|----------------|
|                      | R <sub>0</sub> | R <sub>1</sub> | R <sub>2</sub> | R <sub>3</sub> | R <sub>0</sub> | R <sub>1</sub> | R <sub>2</sub> | R <sub>3</sub> | R <sub>0</sub> | R <sub>1</sub> | R <sub>2</sub> | R <sub>3</sub> |
| <i>M06-2X/6-31G*</i> | 1.649          | 1.487          | 1.484          | 1.484          | 1.552          | 1.525          | 1.526          | 1.526          | 1.552          | 1.525          | 1.526          | 1.526          |
| camB3LYP/6-31G*      | 1.636          | 1.491          | 1.487          | 1.487          | 1.555          | 1.527          | 1.527          | 1.527          | 1.576          | 1.514          | 1.513          | 1.513          |
| camB3LYP/6-311G**    | 1.638          | 1.489          | 1.485          | 1.485          | 1.554          | 1.525          | 1.526          | 1.526          | 1.575          | 1.513          | 1.512          | 1.512          |
| camB3LYP/6-311+G**   | 1.638          | 1.489          | 1.485          | 1.485          | 1.556          | 1.525          | 1.525          | 1.525          | 1.576          | 1.513          | 1.512          | 1.512          |
| B3LYP/6-31G*         | 1.652          | 1.494          | 1.497          | 1.497          | 1.565          | 1.533          | 1.536          | 1.536          | 1.589          | 1.518          | 1.521          | 1.521          |
| B3LYP/6-311G**       | 1.654          | 1.493          | 1.494          | 1.494          | 1.565          | 1.531          | 1.535          | 1.535          | 1.589          | 1.517          | 1.520          | 1.520          |
| B3LYP/6-311+G**      | 1.655          | 1.493          | 1.494          | 1.494          | 1.567          | 1.531          | 1.535          | 1.535          | 1.590          | 1.517          | 1.519          | 1.519          |
| BP86/6-31G*          | 1.655          | 1.498          | 1.503          | 1.503          | 1.569          | 1.537          | 1.543          | 1.543          | 1.595          | 1.521          | 1.526          | 1.526          |
| BP86/6-311G**        | 1.655          | 1.496          | 1.501          | 1.501          | 1.568          | 1.536          | 1.541          | 1.541          | 1.594          | 1.520          | 1.525          | 1.525          |
| BP86/6-311+G**       | 1.656          | 1.496          | 1.501          | 1.501          | 1.570          | 1.535          | 1.540          | 1.540          | 1.595          | 1.520          | 1.524          | 1.524          |
| M06/6-31G*           | 1.632          | 1.485          | 1.486          | 1.486          | 1.548          | 1.522          | 1.525          | 1.525          | 1.570          | 1.508          | 1.511          | 1.511          |
| M06/6-311G**         | 1.632          | 1.483          | 1.484          | 1.484          | 1.547          | 1.520          | 1.523          | 1.523          | 1.569          | 1.507          | 1.509          | 1.509          |
| M06/6-311+G**        | 1.633          | 1.483          | 1.483          | 1.483          | 1.549          | 1.519          | 1.522          | 1.522          | 1.571          | 1.507          | 1.508          | 1.508          |
| B3LYP-D3/6-31G*      | 1.653          | 1.493          | 1.496          | 1.496          | 1.563          | 1.531          | 1.535          | 1.535          | 1.588          | 1.516          | 1.520          | 1.520          |
| B3LYP-D3/6-311G**    | 1.655          | 1.491          | 1.494          | 1.494          | 1.563          | 1.530          | 1.534          | 1.534          | 1.588          | 1.515          | 1.519          | 1.519          |
| B3LYP-D3/6-311+G**   | 1.655          | 1.491          | 1.493          | 1.493          | 1.565          | 1.529          | 1.534          | 1.534          | 1.589          | 1.515          | 1.518          | 1.518          |
| HF/6-31G*            | 1.629          | 1.501          | 1.491          | 1.491          | 1.555          | 1.530          | 1.526          | 1.526          | 1.567          | 1.520          | 1.522          | 1.522          |
| HF/6-311G**          | 1.631          | 1.499          | 1.489          | 1.489          | 1.556          | 1.529          | 1.525          | 1.525          | 1.567          | 1.519          | 1.521          | 1.521          |
| HF/6-311+G**         | 1.632          | 1.499          | 1.489          | 1.489          | 1.558          | 1.529          | 1.525          | 1.525          | 1.568          | 1.519          | 1.521          | 1.521          |
| MP2/6-31G*           | 1.655          | 1.478          | 1.480          | 1.480          | 1.546          | 1.519          | 1.526          | 1.526          | 1.569          | 1.510          | 1.508          | 1.508          |
| MP2/6-311G**         | 1.666          | 1.476          | 1.479          | 1.479          | 1.549          | 1.520          | 1.527          | 1.527          | 1.573          | 1.510          | 1.508          | 1.508          |
| MP2/6-311+G**        | 1.661          | 1.478          | 1.480          | 1.480          | 1.554          | 1.520          | 1.526          | 1.526          | 1.577          | 1.510          | 1.508          | 1.508          |



**Table S2(C):** Benchmarking of the geometrical parameters of pyrene-(CH<sub>3</sub>)<sub>3</sub>C complexes in cationic, anionic, and radical states at different levels of theories. Values are given in Å.

| Methods              | Cation         |                |                |                | Anion          |                |                |                | Radical        |                |                |                |
|----------------------|----------------|----------------|----------------|----------------|----------------|----------------|----------------|----------------|----------------|----------------|----------------|----------------|
|                      | R <sub>0</sub> | R <sub>1</sub> | R <sub>2</sub> | R <sub>3</sub> | R <sub>0</sub> | R <sub>1</sub> | R <sub>2</sub> | R <sub>3</sub> | R <sub>0</sub> | R <sub>1</sub> | R <sub>2</sub> | R <sub>3</sub> |
| <i>M06-2X/6-31G*</i> | 3.462          | 1.431          | 1.427          | 1.427          | 1.609          | 1.536          | 1.534          | 1.534          | 1.369          | 1.520          | 1.516          | 1.516          |
| camB3LYP/6-31G*      | 3.360          | 1.429          | 1.421          | 1.423          | 1.619          | 1.537          | 1.535          | 1.535          | 1.667          | 1.523          | 1.520          | 1.520          |
| camB3LYP/6-311G**    | 3.403          | 1.427          | 1.419          | 1.420          | 1.616          | 1.536          | 1.534          | 1.534          | 1.667          | 1.522          | 1.518          | 1.518          |
| camB3LYP/6-311+G**   | 3.427          | 1.427          | 1.419          | 1.420          | 1.617          | 1.536          | 1.534          | 1.534          | 1.669          | 1.522          | 1.517          | 1.517          |
| B3LYP/6-31G*         | 3.465          | 1.428          | 1.429          | 1.432          | 1.639          | 1.543          | 1.544          | 1.544          | 1.706          | 1.525          | 1.524          | 1.524          |
| B3LYP/6-311G**       | 3.491          | 1.426          | 1.427          | 1.430          | 1.637          | 1.542          | 1.543          | 1.543          | 1.708          | 1.523          | 1.522          | 1.522          |
| B3LYP/6-311+G**      | 3.512          | 1.427          | 1.427          | 1.430          | 1.638          | 1.542          | 1.542          | 1.542          | 1.711          | 1.523          | 1.522          | 1.522          |
| BP86/6-31G*          | 3.471          | 1.431          | 1.437          | 1.441          | 1.642          | 1.546          | 1.549          | 1.549          | 1.721          | 1.525          | 1.527          | 1.527          |
| BP86/6-311G**        | 3.450          | 1.430          | 1.435          | 1.438          | 1.639          | 1.545          | 1.548          | 1.548          | 1.721          | 1.523          | 1.525          | 1.525          |
| BP86/6-311+G**       | 3.465          | 1.430          | 1.435          | 1.438          | 1.640          | 1.545          | 1.547          | 1.547          | 1.724          | 1.523          | 1.525          | 1.525          |
| M06/6-31G*           | 3.133          | 1.425          | 1.425          | 1.428          | 1.611          | 1.533          | 1.533          | 1.533          | 1.666          | 1.517          | 1.516          | 1.516          |
| M06/6-311G**         | 3.141          | 1.422          | 1.423          | 1.425          | 1.610          | 1.530          | 1.531          | 1.531          | 1.665          | 1.514          | 1.514          | 1.514          |
| M06/6-311+G**        | 3.176          | 1.422          | 1.422          | 1.424          | 1.611          | 1.530          | 1.531          | 1.531          | 1.668          | 1.514          | 1.513          | 1.513          |
| B3LYP-D3/6-31G*      | 3.253          | 1.428          | 1.429          | 1.433          | 1.634          | 1.540          | 1.543          | 1.543          | 1.701          | 1.522          | 1.523          | 1.523          |
| B3LYP-D3/6-311G**    | 3.262          | 1.426          | 1.427          | 1.430          | 1.632          | 1.539          | 1.542          | 1.542          | 1.703          | 1.521          | 1.521          | 1.521          |
| B3LYP-D3/6-311+G**   | 3.275          | 1.426          | 1.427          | 1.430          | 1.633          | 1.539          | 1.541          | 1.541          | 1.705          | 1.520          | 1.521          | 1.521          |
| HF/6-31G*            | 3.623          | 1.435          | 1.414          | 1.414          | 1.619          | 1.544          | 1.536          | 1.536          | 1.645          | 1.533          | 1.532          | 1.532          |
| HF/6-311G**          | 3.698          | 1.434          | 1.413          | 1.413          | 1.619          | 1.543          | 1.536          | 1.536          | 1.647          | 1.531          | 1.531          | 1.531          |
| HF/6-311+G**         | 3.730          | 1.434          | 1.413          | 1.413          | 1.621          | 1.543          | 1.536          | 1.536          | 1.648          | 1.531          | 1.531          | 1.531          |
| MP2/6-31G*           | 2.840          | 1.427          | 1.437          | 1.437          | 1.597          | 1.529          | 1.534          | 1.534          | 1.647          | 1.519          | 1.515          | 1.515          |
| MP2/6-311G**         | 2.734          | 1.429          | 1.441          | 1.441          | 1.594          | 1.528          | 1.534          | 1.534          | 1.646          | 1.518          | 1.514          | 1.514          |
| MP2/6-311+G**        | 2.814          | 1.428          | 1.440          | 1.440          | 1.599          | 1.528          | 1.534          | 1.534          | 1.653          | 1.518          | 1.514          | 1.514          |

**Table S3(A):** The geometrical parameters for cationic substrates interacting pyrene obtained at M06-2X/6-31G\* level of theory.

| System                                                        | R0    | R1    | R2    | R2'   | R3    | R3'   | R4    | R4'   | R5    | R5'   | R6    | R6'   | R7    | R7'   | R8    | R8'   | R9    | R9'   | R10   | R11   |
|---------------------------------------------------------------|-------|-------|-------|-------|-------|-------|-------|-------|-------|-------|-------|-------|-------|-------|-------|-------|-------|-------|-------|-------|
| Pristine                                                      | -     | 1.428 | 1.421 | 1.421 | 1.421 | 1.421 | 1.399 | 1.399 | 1.399 | 1.399 | 1.440 | 1.440 | 1.440 | 1.440 | 1.391 | 1.391 | 1.391 | 1.391 | 1.354 | 1.354 |
| H <sup>+</sup>                                                | 1.130 | 1.485 | 1.485 | 1.407 | 1.485 | 1.407 | 1.386 | 1.400 | 1.386 | 1.400 | 1.430 | 1.449 | 1.430 | 1.449 | 1.399 | 1.391 | 1.399 | 1.391 | 1.360 | 1.360 |
| CH <sub>3</sub> <sup>+</sup>                                  | 1.649 | 1.487 | 1.484 | 1.407 | 1.484 | 1.407 | 1.386 | 1.400 | 1.386 | 1.400 | 1.431 | 1.407 | 1.431 | 1.449 | 1.399 | 1.391 | 1.399 | 1.400 | 1.390 | 1.390 |
| (CH <sub>3</sub> )CH <sub>2</sub> <sup>+</sup>                | 1.718 | 1.480 | 1.481 | 1.409 | 1.475 | 1.408 | 1.386 | 1.400 | 1.390 | 1.401 | 1.432 | 1.449 | 1.430 | 1.448 | 1.400 | 1.391 | 1.397 | 1.391 | 1.359 | 1.360 |
| (CH <sub>3</sub> ) <sub>2</sub> CH <sup>+</sup>               | 1.884 | 1.468 | 1.468 | 1.411 | 1.469 | 1.411 | 1.390 | 1.400 | 1.390 | 1.400 | 1.432 | 1.447 | 1.432 | 1.447 | 1.398 | 1.391 | 1.398 | 1.391 | 1.358 | 1.358 |
| (CH <sub>3</sub> ) <sub>3</sub> C <sup>+</sup>                | 3.462 | 1.431 | 1.427 | 1.421 | 1.427 | 1.421 | 1.399 | 1.399 | 1.400 | 1.400 | 1.442 | 1.443 | 1.441 | 1.444 | 1.394 | 1.392 | 1.395 | 1.392 | 1.357 | 1.357 |
| (C <sub>6</sub> H <sub>5</sub> )CH <sub>2</sub> <sup>+</sup>  | 2.332 | 1.440 | 1.438 | 1.418 | 1.437 | 1.415 | 1.394 | 1.400 | 1.399 | 1.400 | 1.439 | 1.444 | 1.434 | 1.444 | 1.397 | 1.393 | 1.392 | 1.391 | 1.357 | 1.359 |
| (C <sub>6</sub> H <sub>5</sub> ) <sub>2</sub> CH <sup>+</sup> | 3.035 | 1.429 | 1.420 | 1.424 | 1.422 | 1.423 | 1.400 | 1.398 | 1.401 | 1.399 | 1.442 | 1.441 | 1.442 | 1.441 | 1.392 | 1.393 | 1.393 | 1.392 | 1.355 | 1.357 |
| (C <sub>6</sub> H <sub>5</sub> ) <sub>3</sub> C <sup>+</sup>  | 3.919 | 1.428 | 1.421 | 1.421 | 1.422 | 1.421 | 1.399 | 1.400 | 1.400 | 1.400 | 1.441 | 1.441 | 1.441 | 1.441 | 1.392 | 1.393 | 1.392 | 1.393 | 1.356 | 1.354 |
| NH <sub>2</sub> <sup>+</sup>                                  | 1.526 | 1.504 | 1.507 | 1.401 | 1.505 | 1.401 | 1.382 | 1.400 | 1.383 | 1.401 | 1.424 | 1.452 | 1.431 | 1.455 | 1.403 | 1.391 | 1.402 | 1.390 | 1.361 | 1.360 |
| (CH <sub>3</sub> )NH <sup>+</sup>                             | 1.544 | 1.500 | 1.509 | 1.400 | 1.499 | 1.403 | 1.374 | 1.400 | 1.393 | 1.401 | 1.429 | 1.456 | 1.423 | 1.450 | 1.412 | 1.392 | 1.392 | 1.390 | 1.357 | 1.363 |
| (CH <sub>3</sub> ) <sub>2</sub> N <sup>+</sup>                | 1.581 | 1.499 | 1.510 | 1.407 | 1.510 | 1.407 | 1.380 | 1.401 | 1.380 | 1.401 | 1.425 | 1.450 | 1.425 | 1.450 | 1.402 | 1.390 | 1.402 | 1.390 | 1.361 | 1.361 |
| (C <sub>6</sub> H <sub>5</sub> )NH <sup>+</sup>               | 1.619 | 1.489 | 1.497 | 1.402 | 1.487 | 1.402 | 1.374 | 1.400 | 1.397 | 1.401 | 1.431 | 1.455 | 1.422 | 1.451 | 1.413 | 1.393 | 1.388 | 1.390 | 1.356 | 1.363 |
| (C <sub>6</sub> H <sub>5</sub> ) <sub>2</sub> N <sup>+</sup>  | 1.581 | 1.499 | 1.510 | 1.407 | 1.510 | 1.407 | 1.380 | 1.401 | 1.380 | 1.401 | 1.425 | 1.450 | 1.425 | 1.450 | 1.402 | 1.390 | 1.402 | 1.390 | 1.361 | 1.361 |
| OH <sup>+</sup>                                               | 1.449 | 1.510 | 1.518 | 1.398 | 1.518 | 1.398 | 1.380 | 1.400 | 1.380 | 1.400 | 1.423 | 1.455 | 1.423 | 1.454 | 1.405 | 1.391 | 1.405 | 1.391 | 1.362 | 1.362 |
| (CH <sub>3</sub> )O <sup>+</sup>                              | 1.156 | 1.510 | 1.523 | 1.401 | 1.516 | 1.399 | 1.379 | 1.399 | 1.376 | 1.402 | 1.422 | 1.455 | 1.428 | 1.458 | 1.401 | 1.392 | 1.407 | 1.390 | 1.362 | 1.360 |
| (C <sub>6</sub> H <sub>5</sub> )O <sup>+</sup>                | 1.506 | 1.501 | 1.512 | 1.401 | 1.507 | 1.400 | 1.374 | 1.400 | 1.384 | 1.401 | 1.427 | 1.456 | 1.421 | 1.454 | 1.408 | 1.393 | 1.398 | 1.390 | 1.358 | 1.364 |

**Table S3(B):** The geometrical parameters for anionic substrates interacting pyrene obtained at M06-2X/6-31G\* level of theory.

| System                                                        | R0    | R1    | R2    | R2'   | R3    | R3'   | R4    | R4'   | R5    | R5'   | R6    | R6'   | R7    | R7'   | R8    | R8'   | R9    | R9'   | R10   | R11   |
|---------------------------------------------------------------|-------|-------|-------|-------|-------|-------|-------|-------|-------|-------|-------|-------|-------|-------|-------|-------|-------|-------|-------|-------|
| Pristine                                                      | -     | 1.428 | 1.421 | 1.421 | 1.421 | 1.421 | 1.399 | 1.399 | 1.399 | 1.399 | 1.440 | 1.440 | 1.440 | 1.440 | 1.391 | 1.391 | 1.391 | 1.391 | 1.354 | 1.354 |
| H <sup>-</sup>                                                | 1.119 | 1.522 | 1.524 | 1.409 | 1.524 | 1.409 | 1.383 | 4.404 | 1.383 | 1.404 | 1.423 | 1.453 | 1.423 | 1.453 | 1.405 | 1.391 | 1.405 | 1.391 | 1.365 | 1.365 |
| CH <sub>3</sub> <sup>-</sup>                                  | 1.552 | 1.525 | 1.526 | 1.411 | 1.526 | 1.411 | 1.384 | 1.403 | 1.384 | 4.404 | 1.424 | 1.452 | 1.424 | 1.452 | 1.404 | 1.391 | 1.404 | 1.391 | 1.364 | 1.364 |
| (CH <sub>3</sub> )CH <sub>2</sub> <sup>-</sup>                | 1.563 | 1.527 | 1.528 | 1.412 | 1.527 | 1.412 | 1.384 | 1.43  | 1.385 | 1.404 | 1.424 | 1.451 | 1.425 | 1.451 | 1.403 | 1.391 | 1.404 | 1.391 | 1.364 | 1.363 |
| (CH <sub>3</sub> ) <sub>2</sub> CH <sup>-</sup>               | 1.582 | 1.530 | 1.531 | 1.414 | 1.531 | 1.414 | 1.386 | 1.404 | 1.386 | 1.404 | 1.424 | 1.451 | 1.424 | 1.451 | 1.403 | 1.390 | 1.403 | 1.390 | 1.362 | 1.362 |
| (CH <sub>3</sub> ) <sub>3</sub> C <sup>-</sup>                | 1.609 | 1.536 | 1.534 | 1.415 | 1.534 | 1.415 | 1.387 | 1.404 | 1.387 | 1.404 | 1.427 | 1.449 | 1.427 | 1.450 | 1.401 | 1.390 | 1.401 | 1.390 | 1.361 | 1.361 |
| (C <sub>6</sub> H <sub>5</sub> )CH <sub>2</sub> <sup>-</sup>  | 1.594 | 1.519 | 1.522 | 1.412 | 1.520 | 1.411 | 1.387 | 1.404 | 1.382 | 1.403 | 1.422 | 1.451 | 1.428 | 1.451 | 1.401 | 1.391 | 1.407 | 1.391 | 1.365 | 1.360 |
| (C <sub>6</sub> H <sub>5</sub> ) <sub>2</sub> CH <sup>-</sup> | 1.653 | 1.518 | 1.520 | 1.412 | 1.516 | 1.412 | 1.388 | 1.404 | 1.386 | 1.402 | 1.423 | 1.449 | 1.430 | 1.448 | 1.397 | 1.391 | 1.403 | 1.391 | 1.366 | 1.360 |
| (C <sub>6</sub> H <sub>5</sub> ) <sub>3</sub> C <sup>-</sup>  | 4.743 | 1.427 | 1.420 | 1.422 | 1.421 | 1.422 | 1.398 | 1.399 | 1.399 | 1.401 | 1.441 | 1.441 | 1.438 | 1.438 | 1.391 | 1.392 | 1.391 | 1.391 | 1.355 | 1.356 |
| NH <sub>2</sub> <sup>-</sup>                                  | 1.508 | 1.517 | 1.516 | 1.412 | 1.519 | 1.412 | 1.383 | 1.402 | 1.389 | 1.404 | 1.428 | 1.450 | 1.426 | 1.450 | 1.406 | 1.392 | 1.400 | 1.390 | 1.360 | 1.364 |
| (CH <sub>3</sub> )NH <sup>-</sup>                             | 1.511 | 1.518 | 1.518 | 1.413 | 1.520 | 1.413 | 1.384 | 1.402 | 1.389 | 1.405 | 1.428 | 1.450 | 1.425 | 1.449 | 1.405 | 1.392 | 1.400 | 1.390 | 1.360 | 1.363 |
| (CH <sub>3</sub> ) <sub>2</sub> N <sup>-</sup>                | 1.529 | 1.522 | 1.519 | 1.416 | 1.519 | 1.416 | 1.387 | 1.404 | 1.387 | 1.404 | 1.426 | 1.449 | 1.426 | 1.449 | 1.399 | 1.390 | 1.399 | 1.390 | 1.362 | 1.362 |
| (C <sub>6</sub> H <sub>5</sub> )NH <sup>-</sup>               | 1.572 | 1.504 | 1.507 | 1.413 | 1.508 | 1.413 | 1.386 | 1.403 | 1.388 | 1.403 | 1.426 | 1.448 | 1.428 | 1.447 | 1.402 | 1.392 | 1.402 | 1.390 | 1.361 | 1.360 |
| (C <sub>6</sub> H <sub>5</sub> ) <sub>2</sub> N <sup>-</sup>  | 3.602 | 1.428 | 1.419 | 1.420 | 1.420 | 1.419 | 1.397 | 1.397 | 1.401 | 1.400 | 1.440 | 1.441 | 1.440 | 1.440 | 1.393 | 1.391 | 1.390 | 1.390 | 1.353 | 1.355 |
| OH <sup>-</sup>                                               | 1.476 | 1.505 | 1.507 | 1.412 | 1.507 | 1.412 | 1.388 | 1.403 | 1.388 | 1.403 | 1.429 | 1.449 | 1.429 | 1.449 | 1.402 | 1.391 | 1.402 | 1.391 | 1.360 | 1.360 |
| (CH <sub>3</sub> )O <sup>-</sup>                              | 1.494 | 1.507 | 1.503 | 1.415 | 1.504 | 1.415 | 1.385 | 1.402 | 1.391 | 1.405 | 1.428 | 1.448 | 1.426 | 1.447 | 1.402 | 1.392 | 1.396 | 1.390 | 1.360 | 1.363 |
| (C <sub>6</sub> H <sub>5</sub> )O <sup>-</sup>                | 2.984 | 1.426 | 1.418 | 1.418 | 1.419 | 1.419 | 1.400 | 1.400 | 1.397 | 1.397 | 1.441 | 1.441 | 1.439 | 1.439 | 1.389 | 1.389 | 1.393 | 1.393 | 1.352 | 1.352 |

**Table S3(C):** The geometrical parameters for radical substrates interacting with pyrene obtained at M06-2X/6-31G\* level of theory.

| System                                                        | R0    | R1    | R2    | R2'   | R3    | R3'   | R4    | R4'   | R5    | R5'   | R6    | R6'   | R7    | R7'   | R8    | R8'   | R9    | R9'   | R10   | R11   |
|---------------------------------------------------------------|-------|-------|-------|-------|-------|-------|-------|-------|-------|-------|-------|-------|-------|-------|-------|-------|-------|-------|-------|-------|
| Pristine                                                      | -     | 1.428 | 1.421 | 1.421 | 1.421 | 1.421 | 1.399 | 1.399 | 1.399 | 1.399 | 1.440 | 1.440 | 1.440 | 1.440 | 1.391 | 1.391 | 1.391 | 1.391 | 1.354 | 1.354 |
| H <sup>•</sup>                                                | 1.120 | 1.508 | 1.508 | 1.404 | 1.508 | 1.404 | 1.380 | 1.401 | 1.380 | 1.401 | 1.431 | 1.455 | 1.431 | 1.455 | 1.405 | 1.391 | 1.405 | 1.391 | 1.358 | 1.358 |
| CH <sub>3</sub> <sup>•</sup>                                  | 1.578 | 1.511 | 1.511 | 1.405 | 1.511 | 1.405 | 1.381 | 1.401 | 1.381 | 1.401 | 1.431 | 1.454 | 1.431 | 1.454 | 1.404 | 1.390 | 1.405 | 1.390 | 1.358 | 1.358 |
| (CH <sub>3</sub> )CH <sub>2</sub> <sup>•</sup>                | 1.599 | 1.511 | 1.513 | 1.406 | 1.509 | 1.406 | 1.380 | 1.401 | 1.383 | 1.401 | 1.430 | 1.454 | 1.430 | 1.454 | 1.405 | 1.390 | 1.403 | 1.390 | 1.358 | 1.358 |
| (CH <sub>3</sub> ) <sub>2</sub> CH <sup>•</sup>               | 1.630 | 1.511 | 1.514 | 1.408 | 1.514 | 1.408 | 1.383 | 1.401 | 1.382 | 1.401 | 1.430 | 1.454 | 1.430 | 1.454 | 1.404 | 1.390 | 1.404 | 1.390 | 1.357 | 1.357 |
| (CH <sub>3</sub> ) <sub>3</sub> C <sup>•</sup>                | 1.369 | 1.520 | 1.516 | 1.409 | 1.516 | 1.409 | 1.383 | 1.401 | 1.382 | 1.401 | 1.433 | 1.453 | 1.433 | 1.453 | 1.402 | 1.389 | 1.402 | 1.389 | 1.355 | 1.355 |
| (C <sub>6</sub> H <sub>5</sub> )CH <sub>2</sub> <sup>•</sup>  | 1.623 | 1.506 | 1.509 | 1.407 | 1.505 | 1.406 | 1.381 | 1.401 | 1.384 | 1.401 | 1.431 | 1.454 | 1.429 | 1.453 | 1.405 | 1.391 | 1.403 | 1.390 | 1.358 | 1.358 |
| (C <sub>6</sub> H <sub>5</sub> ) <sub>2</sub> CH <sup>•</sup> | 1.682 | 1.509 | 1.507 | 1.408 | 1.502 | 1.406 | 1.380 | 1.401 | 1.383 | 1.400 | 1.433 | 1.454 | 1.433 | 1.452 | 1.402 | 1.391 | 1.402 | 1.390 | 1.358 | 1.356 |
| (C <sub>6</sub> H <sub>5</sub> ) <sub>3</sub> C <sup>•</sup>  | 4.091 | 1.430 | 1.420 | 1.420 | 1.421 | 1.422 | 1.399 | 1.398 | 1.398 | 1.399 | 1.441 | 1.441 | 1.440 | 1.441 | 1.390 | 1.390 | 1.390 | 1.391 | 1.361 | 1.358 |
| NH <sub>2</sub> <sup>•</sup>                                  | 1.509 | 1.512 | 1.513 | 1.404 | 1.514 | 1.404 | 1.379 | 1.400 | 1.383 | 1.402 | 1.431 | 1.454 | 1.432 | 1.456 | 1.407 | 1.391 | 1.403 | 1.390 | 1.356 | 1.358 |
| (CH <sub>3</sub> )NH <sup>•</sup>                             | 1.512 | 1.513 | 1.516 | 1.405 | 1.514 | 1.404 | 1.377 | 1.400 | 1.386 | 1.402 | 1.432 | 1.455 | 1.429 | 1.454 | 1.410 | 1.391 | 1.400 | 1.389 | 1.355 | 1.359 |
| (CH <sub>3</sub> ) <sub>2</sub> N <sup>•</sup>                | 1.533 | 1.516 | 1.518 | 1.408 | 1.518 | 1.408 | 1.380 | 1.401 | 1.380 | 1.401 | 1.430 | 1.454 | 1.430 | 1.454 | 1.403 | 1.390 | 1.403 | 1.390 | 1.357 | 1.357 |
| (C <sub>6</sub> H <sub>5</sub> )NH <sup>•</sup>               | 1.543 | 1.506 | 1.512 | 1.405 | 1.510 | 1.404 | 1.377 | 1.400 | 1.387 | 1.401 | 1.432 | 1.454 | 1.428 | 1.453 | 1.410 | 1.392 | 1.399 | 1.390 | 1.355 | 1.358 |
| (C <sub>6</sub> H <sub>5</sub> ) <sub>2</sub> N <sup>•</sup>  | 1.540 | 1.514 | 1.514 | 1.405 | 1.513 | 1.404 | 1.375 | 1.400 | 1.386 | 1.401 | 1.435 | 1.455 | 1.432 | 1.453 | 1.408 | 1.391 | 1.399 | 1.389 | 1.355 | 1.357 |
| OH <sup>•</sup>                                               | 1.458 | 1.508 | 1.513 | 1.403 | 1.513 | 1.403 | 1.381 | 1.400 | 1.381 | 1.400 | 1.432 | 1.455 | 1.432 | 1.455 | 1.405 | 1.390 | 1.405 | 1.390 | 1.356 | 1.356 |
| (CH <sub>3</sub> )O <sup>•</sup>                              | 1.465 | 1.511 | 1.514 | 1.406 | 1.512 | 1.405 | 1.377 | 1.399 | 1.381 | 1.402 | 1.431 | 1.455 | 1.431 | 1.455 | 1.405 | 1.392 | 1.403 | 1.389 | 1.356 | 1.358 |
| (C <sub>6</sub> H <sub>5</sub> )O <sup>•</sup>                | 1.508 | 1.503 | 1.507 | 1.406 | 1.504 | 1.404 | 1.376 | 1.400 | 1.385 | 1.401 | 1.432 | 1.454 | 1.429 | 1.453 | 1.407 | 1.392 | 1.399 | 1.390 | 1.356 | 1.358 |

**Table S4(A):** Benchmarking of the interaction energies (IE; kcal/mol) of pyrene-H complexes in cationic, anionic, and radical states at different levels of theories. The value obtained at M06-2X/6-311G\*\*//M06-2X/6-31G\* level of theory is considered as a reference (energy zero) to calculate the absolute relative energy (RE; kcal/mol).

| <b>Methods</b>                        | <b>Cation</b>  | <b>RE</b>   | <b>Anion</b>  | <b>RE</b>   | <b>Radical</b> | <b>RE</b>   |
|---------------------------------------|----------------|-------------|---------------|-------------|----------------|-------------|
| <i>M06-2X/6-311G**//M06-2X/6-31G*</i> | <i>-197.03</i> | <i>0.00</i> | <i>-74.44</i> | <i>0.00</i> | <i>-37.65</i>  | <i>0.00</i> |
| M06-2X/6-311G**//camB3LYP/6-31G*      | -197.81        | 0.78        | -73.63        | 0.81        | -37.73         | 0.08        |
| M06-2X/6-311G**//camB3LYP/6-311G**    | -196.85        | 0.18        | -73.17        | 1.27        | -37.40         | 0.25        |
| M06-2X/6-311G**//camB3LYP/6-311+G**   | -196.83        | 0.20        | -72.28        | 2.16        | -37.13         | 0.52        |
| M06-2X/6-311G**//B3LYP/6-31G*         | -199.11        | 2.08        | -74.39        | 0.05        | -38.29         | 0.64        |
| M06-2X/6-311G**//B3LYP/6-311G**       | -198.20        | 1.17        | -73.95        | 0.49        | -37.96         | 0.31        |
| M06-2X/6-311G**//B3LYP/6-311+G**      | -198.19        | 1.16        | -73.08        | 1.36        | -37.68         | 0.03        |
| M06-2X/6-311G**//BP86/6-31G*          | -199.21        | 2.18        | -75.74        | 1.30        | -38.46         | 0.81        |
| M06-2X/6-311G**//BP86/6-311G**        | -198.18        | 1.15        | -75.39        | 0.95        | -38.10         | 0.45        |
| M06-2X/6-311G**//BP86/6-311+G**       | -198.19        | 1.16        | -74.64        | 0.20        | -37.84         | 0.19        |
| M06-2X/6-311G**//M06/6-31G*           | -197.44        | 0.41        | -73.06        | 1.38        | -36.65         | 1.00        |
| M06-2X/6-311G**//M06/6-311G**         | -196.51        | 0.52        | -72.49        | 1.95        | -36.37         | 1.28        |
| M06-2X/6-311G**//M06/6-311+G**        | -196.42        | 0.61        | -71.67        | 2.77        | -36.03         | 1.62        |
| M06-2X/6-311G**//B3LYP-D3/6-31G*      | -199.01        | 1.98        | -74.30        | 0.14        | -38.17         | 0.52        |
| M06-2X/6-311G**//B3LYP-D3/6-311G**    | -198.09        | 1.06        | -73.86        | 0.58        | -37.84         | 0.19        |
| M06-2X/6-311G**//B3LYP-D3/6-311+G**   | -198.08        | 1.05        | -72.99        | 1.45        | -37.57         | 0.08        |
| M06-2X/6-311G**//HF/6-31G*            | -200.71        | 3.68        | -73.11        | 1.33        | -39.67         | 2.02        |
| M06-2X/6-311G**//HF/6-311G**          | -200.04        | 3.01        | -72.74        | 1.70        | -39.49         | 1.84        |
| M06-2X/6-311G**//HF/6-311+G**         | -199.95        | 2.92        | -71.79        | 2.65        | -39.24         | 1.59        |
| M06-2X/6-311G**//MP2/6-31G*           | -196.18        | 0.85        | -76.30        | 1.86        | -39.12         | 1.47        |
| M06-2X/6-311G**//MP2/6-311G**         | -194.55        | 2.48        | -76.62        | 2.18        | -39.30         | 1.65        |
| M06-2X/6-311G**//MP2/6-311+G**        | -194.94        | 2.09        | -75.27        | 0.83        | -39.23         | 1.58        |

**Table S4(B):** Benchmarking of the interaction energies (IE, kcal/mol) of pyrene-CH<sub>3</sub> complexes in cationic, anionic, and radical states at different levels of theories. The value obtained at M06-2X/6-311G\*\*//M06-2X/6-31G\* level of theory is considered as a reference (energy zero) to calculate the absolute relative energy (RE; kcal/mol).

| Methods                               | Cation  | RE   | Anion  | RE   | Radical | RE   |
|---------------------------------------|---------|------|--------|------|---------|------|
| <i>M06-2X/6-311G**//M06-2X/6-31G*</i> | -126.43 | 0.00 | -82.07 | 0.00 | -37.69  | 0.00 |
| M06-2X/6-311G**//camB3LYP/6-31G*      | -130.07 | 3.64 | -82.23 | 0.16 | -38.97  | 1.28 |
| M06-2X/6-311G**//camB3LYP/6-311G**    | -129.72 | 3.29 | -82.03 | 0.04 | -39.02  | 1.33 |
| M06-2X/6-311G**//camB3LYP/6-311+G**   | -129.6  | 3.17 | -81.78 | 0.29 | -38.91  | 1.22 |
| M06-2X/6-311G**//B3LYP/6-31G*         | -130.47 | 4.04 | -83.32 | 1.25 | -39.67  | 1.98 |
| M06-2X/6-311G**//B3LYP/6-311G**       | -130.05 | 3.62 | -83.12 | 1.05 | -39.54  | 1.85 |
| M06-2X/6-311G**//B3LYP/6-311+G**      | -129.91 | 3.48 | -82.83 | 0.76 | -39.44  | 1.75 |
| M06-2X/6-311G**//BP86/6-31G*          | -130.03 | 3.60 | -84.30 | 2.23 | -39.52  | 1.83 |
| M06-2X/6-311G**//BP86/6-311G**        | -129.66 | 3.23 | -84.04 | 1.97 | -39.31  | 1.62 |
| M06-2X/6-311G**//BP86/6-311+G**       | -129.46 | 3.03 | -83.82 | 1.75 | -39.22  | 1.53 |
| M06-2X/6-311G**//M06/6-31G*           | -129.43 | 3.00 | -81.34 | 0.73 | -37.85  | 0.16 |
| M06-2X/6-311G**//M06/6-311G**         | -129.00 | 2.57 | -80.96 | 1.11 | -37.69  | 0.00 |
| M06-2X/6-311G**//M06/6-311+G**        | -128.77 | 2.34 | -80.64 | 1.43 | -37.55  | 0.14 |
| M06-2X/6-311G**//B3LYP-D3/6-31G*      | -129.66 | 3.23 | -82.72 | 0.65 | -38.99  | 1.30 |
| M06-2X/6-311G**//B3LYP-D3/6-311G**    | -129.23 | 2.80 | -82.52 | 0.45 | -38.85  | 1.16 |
| M06-2X/6-311G**//B3LYP-D3/6-311+G**   | -129.09 | 2.66 | -82.22 | 0.15 | -38.75  | 1.06 |
| M06-2X/6-311G**//HF/6-31G*            | -134.64 | 8.21 | -82.52 | 0.45 | -42.09  | 4.40 |
| M06-2X/6-311G**//HF/6-311G**          | -134.14 | 7.71 | -82.42 | 0.35 | -42.00  | 4.31 |
| M06-2X/6-311G**//HF/6-311+G**         | -134.03 | 7.60 | -82.13 | 0.06 | -41.95  | 4.26 |
| M06-2X/6-311G**//MP2/6-31G*           | -123.57 | 2.86 | -83.32 | 1.25 | -38.58  | 0.89 |
| M06-2X/6-311G**//MP2/6-311G**         | -121.01 | 5.42 | -82.79 | 0.72 | -37.78  | 0.09 |
| M06-2X/6-311G**//MP2/6-311+G**        | -122.7  | 3.73 | -82.49 | 0.42 | -37.87  | 0.18 |



**Table S4(C):** Benchmarking of the interaction energies (IE, kcal/mol) of pyrene-(CH<sub>3</sub>)<sub>3</sub>C complexes in cationic, anionic, and radical states at different levels of theories. The value obtained at M06-2X/6-311G\*\*//M06-2X/6-31G\* level of theory is considered as a reference (energy zero) to calculate the absolute relative energy (RE; kcal/mol).

| Methods                             | Cation | RE   | Anion  | RE   | Radical | RE   |
|-------------------------------------|--------|------|--------|------|---------|------|
| M06-2X/6-311G**//M06-2X/6-31G*      | -24.96 | 0.00 | -85.11 | 0.00 | -36.52  | 0.00 |
| M06-2X/6-311G**//camB3LYP/6-31G*    | -23.49 | 1.47 | -85.69 | 0.58 | -38.77  | 2.25 |
| M06-2X/6-311G**//camB3LYP/6-311G**  | -23.09 | 1.87 | -85.64 | 0.53 | -38.38  | 1.86 |
| M06-2X/6-311G**//camB3LYP/6-311+G** | -22.90 | 2.06 | -85.46 | 0.35 | -38.25  | 1.73 |
| M06-2X/6-311G**//B3LYP/6-31G*       | -22.70 | 2.26 | -86.41 | 1.30 | -37.45  | 0.93 |
| M06-2X/6-311G**//B3LYP/6-311G**     | -22.32 | 2.64 | -86.37 | 1.26 | -36.91  | 0.39 |
| M06-2X/6-311G**//B3LYP/6-311+G**    | -22.10 | 2.86 | -86.15 | 1.04 | -36.70  | 0.18 |
| M06-2X/6-311G**//BP86/6-31G*        | -22.76 | 2.20 | -86.44 | 1.33 | -35.66  | 0.86 |
| M06-2X/6-311G**//BP86/6-311G**      | -22.87 | 2.09 | -86.29 | 1.18 | -34.99  | 1.53 |
| M06-2X/6-311G**//BP86/6-311+G**     | -22.71 | 2.25 | -86.07 | 0.96 | -34.72  | 1.80 |
| M06-2X/6-311G**//M06/6-31G*         | -24.46 | 0.50 | -84.54 | 0.57 | -36.88  | 0.36 |
| M06-2X/6-311G**//M06/6-311G**       | -24.36 | 0.60 | -84.18 | 0.93 | -36.52  | 0.00 |
| M06-2X/6-311G**//M06/6-311+G**      | -24.17 | 0.79 | -83.82 | 1.29 | -36.28  | 0.24 |
| M06-2X/6-311G**//B3LYP-D3/6-31G*    | -24.27 | 0.69 | -85.77 | 0.66 | -36.78  | 0.26 |
| M06-2X/6-311G**//B3LYP-D3/6-311G**  | -24.08 | 0.88 | -85.72 | 0.61 | -36.24  | 0.28 |
| M06-2X/6-311G**//B3LYP-D3/6-311+G** | -24.05 | 0.91 | -85.48 | 0.37 | -36.03  | 0.49 |
| M06-2X/6-311G**//HF/6-31G*          | -20.41 | 4.55 | -87.80 | 2.69 | -43.91  | 7.39 |
| M06-2X/6-311G**//HF/6-311G**        | -19.69 | 5.27 | -87.79 | 2.68 | -43.72  | 7.20 |
| M06-2X/6-311G**//HF/6-311+G**       | -19.26 | 5.70 | -87.64 | 2.53 | -43.69  | 7.17 |
| M06-2X/6-311G**//MP2/6-31G*         | -25.99 | 1.03 | -85.85 | 0.74 | -38.22  | 1.70 |
| M06-2X/6-311G**//MP2/6-311G**       | -25.63 | 0.67 | -84.64 | 0.47 | -37.22  | 0.70 |
| M06-2X/6-311G**//MP2/6-311+G**      | -25.86 | 0.90 | -84.24 | 0.87 | -37.17  | 0.65 |

**Table S5(A).** Contribution of each energy component into the interaction energy (IE; kcal/mol) of cationic substrates-pyrene complexes obtained using LMOEDA scheme at M06-2X/6-311G\*\* level of theory.

| Systems                                                       | Electrostatic | Exchange | Repulsion | Polarization | Dispersion | IE       |
|---------------------------------------------------------------|---------------|----------|-----------|--------------|------------|----------|
| H <sup>+</sup>                                                | 35.790        | 0.000    | 0.000     | -232.950     | 0.050      | -197.120 |
| CH <sub>3</sub> <sup>+</sup>                                  | -45.330       | -68.910  | 217.240   | -200.990     | -28.470    | -126.480 |
| (CH <sub>3</sub> )CH <sub>2</sub> <sup>+</sup>                | -52.710       | -75.420  | 231.380   | -164.520     | -33.390    | -94.650  |
| (CH <sub>3</sub> ) <sub>2</sub> CH <sup>+</sup>               | -46.600       | -62.210  | 189.690   | -110.800     | -37.560    | -67.480  |
| (CH <sub>3</sub> ) <sub>3</sub> C <sup>+</sup>                | -18.250       | -13.730  | 47.720    | -12.550      | -28.240    | -25.050  |
| (C <sub>6</sub> H <sub>5</sub> )CH <sub>2</sub> <sup>+</sup>  | -27.530       | -31.200  | 96.280    | -31.730      | -33.190    | -27.370  |
| (C <sub>6</sub> H <sub>5</sub> ) <sub>2</sub> CH <sup>+</sup> | -15.580       | -15.830  | 54.530    | -7.560       | -34.500    | -18.940  |
| (C <sub>6</sub> H <sub>5</sub> ) <sub>3</sub> C <sup>+</sup>  | -12.450       | -12.740  | 47.090    | -4.150       | -32.740    | -14.990  |
| NH <sub>2</sub> <sup>+</sup>                                  | -101.410      | -128.560 | 419.860   | -320.420     | -29.890    | -160.420 |
| (CH <sub>3</sub> )NH <sup>+</sup>                             | -121.220      | -148.460 | 472.270   | -281.490     | -35.180    | -114.070 |
| (CH <sub>3</sub> ) <sub>2</sub> N <sup>+</sup>                | -125.790      | -155.120 | 483.910   | -248.170     | -42.070    | -87.230  |
| (C <sub>6</sub> H <sub>5</sub> )NH <sup>+</sup>               | -112.610      | -145.080 | 439.970   | -197.030     | -41.390    | -56.140  |
| (C <sub>6</sub> H <sub>5</sub> ) <sub>2</sub> N <sup>+</sup>  | -120.830      | -158.370 | 477.320   | -195.810     | -54.270    | -51.950  |
| OH <sup>+</sup>                                               | -76.790       | -116.230 | 400.250   | -418.360     | -29.860    | -241.000 |
| (CH <sub>3</sub> )O <sup>+</sup>                              | -108.910      | -149.300 | 492.000   | -363.560     | -33.910    | -163.670 |
| (C <sub>6</sub> H <sub>5</sub> )O <sup>+</sup>                | -123.790      | -161.910 | 505.390   | -251.470     | -40.320    | -72.110  |

**Table S5(B).** Contribution of each energy component into the interaction energy (IE; kcal/mol) of anionic substrates-pyrene complexes obtained using LMOEDA scheme at M06-2X/6-311G\*\* level of theory.

| Systems                                                       | Electrostatic | Exchange | Repulsion | Polarization | Dispersion | IE      |
|---------------------------------------------------------------|---------------|----------|-----------|--------------|------------|---------|
| H <sup>-</sup>                                                | -208.570      | -272.840 | 724.780   | -287.610     | -30.090    | -74.320 |
| CH <sub>3</sub> <sup>-</sup>                                  | -292.220      | -320.910 | 904.180   | -334.550     | -38.190    | -81.690 |
| (CH <sub>3</sub> )CH <sub>2</sub> <sup>-</sup>                | -295.310      | -321.290 | 909.360   | -336.440     | -43.100    | -86.780 |
| (CH <sub>3</sub> ) <sub>2</sub> CH <sup>-</sup>               | -283.020      | -310.400 | 879.020   | -324.340     | -48.760    | -87.500 |
| (CH <sub>3</sub> ) <sub>3</sub> C <sup>-</sup>                | -261.590      | -293.530 | 828.330   | -303.840     | -54.330    | -84.970 |
| (C <sub>6</sub> H <sub>5</sub> )CH <sub>2</sub> <sup>-</sup>  | -217.130      | -253.600 | 715.440   | -256.130     | -44.880    | -56.300 |
| (C <sub>6</sub> H <sub>5</sub> ) <sub>2</sub> CH <sup>-</sup> | -175.230      | -219.020 | 615.880   | -209.770     | -52.790    | -40.920 |
| (C <sub>6</sub> H <sub>5</sub> ) <sub>3</sub> C <sup>-</sup>  | -9.520        | -17.010  | 52.550    | -6.770       | -30.870    | -11.620 |
| NH <sub>2</sub> <sup>-</sup>                                  | -265.400      | -299.430 | 843.730   | -312.150     | -36.040    | -69.280 |
| (CH <sub>3</sub> )NH <sup>-</sup>                             | -255.080      | -287.240 | 816.060   | -303.480     | -41.370    | -71.100 |
| (CH <sub>3</sub> ) <sub>2</sub> N <sup>-</sup>                | -229.340      | -267.100 | 760.340   | -280.970     | -48.010    | -65.070 |
| (C <sub>6</sub> H <sub>5</sub> )NH <sup>-</sup>               | -177.400      | -221.980 | 629.230   | -218.510     | -41.690    | -30.350 |
| (C <sub>6</sub> H <sub>5</sub> ) <sub>2</sub> N <sup>-</sup>  | -5.060        | -17.610  | 52.380    | -8.020       | -28.780    | -7.080  |
| OH <sup>-</sup>                                               | -229.770      | -268.770 | 756.310   | -280.920     | -32.080    | -55.230 |
| (CH <sub>3</sub> )O <sup>-</sup>                              | -201.820      | -241.020 | 682.700   | -250.840     | -37.600    | -48.580 |
| (C <sub>6</sub> H <sub>5</sub> )O <sup>-</sup>                | -2.000        | -18.220  | 51.730    | -11.310      | -24.140    | -3.940  |

**Table S5(C).** Contribution of each energy component into the interaction energy (IE; kcal/mol) of cationic radical-pyrene complexes obtained using LMOEDA scheme at M06-2X/6-311G\*\* level of theory.

| Systems                                                       | Electrostatic | Exchange | Repulsion | Polarization | Dispersion | IE       |
|---------------------------------------------------------------|---------------|----------|-----------|--------------|------------|----------|
| H <sup>o</sup>                                                | -             | -        | -         | -            | -          | -350.330 |
| CH <sub>3</sub> <sup>o</sup>                                  | -133.930      | -162.680 | 480.620   | -187.210     | -34.450    | -37.650  |
| (CH <sub>3</sub> )CH <sub>2</sub> <sup>o</sup>                | -135.430      | -164.530 | 483.540   | -180.590     | -39.830    | -36.840  |
| (CH <sub>3</sub> ) <sub>2</sub> CH <sup>o</sup>               | -131.790      | -162.340 | 473.640   | -170.240     | -45.760    | -36.480  |
| (CH <sub>3</sub> ) <sub>3</sub> C <sup>o</sup>                | -125.140      | -157.690 | 456.200   | -158.500     | -51.350    | -36.480  |
| (C <sub>6</sub> H <sub>5</sub> )CH <sub>2</sub> <sup>o</sup>  | -128.300      | -161.700 | 472.100   | -167.780     | -45.260    | -30.930  |
| (C <sub>6</sub> H <sub>5</sub> ) <sub>2</sub> CH <sup>o</sup> | -116.430      | -153.820 | 444.360   | -146.120     | -54.370    | -26.380  |
| (C <sub>6</sub> H <sub>5</sub> ) <sub>3</sub> C <sup>o</sup>  | -7.520        | -13.070  | 45.760    | -2.780       | -30.820    | -8.440   |
| NH <sub>2</sub> <sup>o</sup>                                  | -156.020      | -190.760 | 572.440   | -217.890     | -35.080    | -27.310  |
| (CH <sub>3</sub> )NH <sup>o</sup>                             | -167.730      | -201.700 | 605.260   | -219.020     | -40.530    | -23.730  |
| (CH <sub>3</sub> ) <sub>2</sub> N <sup>o</sup>                | -169.910      | -205.840 | 613.880   | -210.590     | -47.280    | -19.740  |
| (C <sub>6</sub> H <sub>5</sub> )NH <sup>o</sup>               | -154.120      | -192.460 | 573.410   | -198.870     | -44.460    | -16.500  |
| (C <sub>6</sub> H <sub>5</sub> ) <sub>2</sub> N <sup>o</sup>  | -166.750      | -204.610 | 617.460   | -206.900     | -56.050    | -16.850  |
| OH <sup>o</sup>                                               | -127.480      | -169.350 | 516.810   | -218.810     | -33.290    | -32.120  |
| (CH <sub>3</sub> )O <sup>o</sup>                              | -136.760      | -178.970 | 544.980   | -213.850     | -38.720    | -23.320  |
| (C <sub>6</sub> H <sub>5</sub> )O <sup>o</sup>                | -131.600      | -174.590 | 523.730   | -186.510     | -41.390    | -10.350  |

**Table S6(A).** Percentage contribution of each energy component into the interaction energy of cationic substrates-pyrene complexes obtained using LMOEDA scheme at M06-2X/6-311G\*\* level of theory.

| Systems                                                       | Electrostatic | Exchange | Polarization | Dispersion |
|---------------------------------------------------------------|---------------|----------|--------------|------------|
| H <sup>+</sup>                                                | -18.16        | 0.00     | 118.18       | -0.03      |
| CH <sub>3</sub> <sup>+</sup>                                  | 13.19         | 20.05    | 58.48        | 8.28       |
| (CH <sub>3</sub> )CH <sub>2</sub> <sup>+</sup>                | 16.17         | 23.13    | 50.46        | 10.24      |
| (CH <sub>3</sub> ) <sub>2</sub> CH <sup>+</sup>               | 18.12         | 24.19    | 43.08        | 14.61      |
| (CH <sub>3</sub> ) <sub>3</sub> C <sup>+</sup>                | 25.08         | 18.87    | 17.25        | 38.81      |
| (C <sub>6</sub> H <sub>5</sub> )CH <sub>2</sub> <sup>+</sup>  | 22.26         | 25.23    | 25.66        | 26.84      |
| (C <sub>6</sub> H <sub>5</sub> ) <sub>2</sub> CH <sup>+</sup> | 21.21         | 21.55    | 10.29        | 46.96      |
| (C <sub>6</sub> H <sub>5</sub> ) <sub>3</sub> C <sup>+</sup>  | 20.05         | 20.52    | 6.68         | 52.74      |
| NH <sub>2</sub> <sup>+</sup>                                  | 17.48         | 22.15    | 55.22        | 5.15       |
| (CH <sub>3</sub> )NH <sup>+</sup>                             | 20.67         | 25.32    | 48.01        | 6.00       |
| (CH <sub>3</sub> ) <sub>2</sub> N <sup>+</sup>                | 22.02         | 27.16    | 43.45        | 7.37       |
| (C <sub>6</sub> H <sub>5</sub> )NH <sup>+</sup>               | 22.70         | 29.24    | 39.71        | 8.34       |
| (C <sub>6</sub> H <sub>5</sub> ) <sub>2</sub> N <sup>+</sup>  | 22.83         | 29.92    | 37.00        | 10.25      |
| OH <sup>+</sup>                                               | 11.98         | 18.13    | 65.24        | 4.66       |
| (CH <sub>3</sub> )O <sup>+</sup>                              | 16.61         | 22.77    | 55.45        | 5.17       |
| (C <sub>6</sub> H <sub>5</sub> )O <sup>+</sup>                | 21.44         | 28.04    | 43.55        | 6.98       |

**Table S6(B).** Percentage contribution of each energy component into the interaction energy of anionic substrates-pyrene complexes obtained using LMOEDA scheme at M06-2X/6-311G\*\* level of theory.

| Systems                                                       | Electrostatic | Exchange | Polarization | Dispersion |
|---------------------------------------------------------------|---------------|----------|--------------|------------|
| H <sup>-</sup>                                                | 26.10         | 34.14    | 35.99        | 3.77       |
| CH <sub>3</sub> <sup>-</sup>                                  | 29.64         | 32.55    | 33.93        | 3.87       |
| (CH <sub>3</sub> )CH <sub>2</sub> <sup>-</sup>                | 29.65         | 32.25    | 33.77        | 4.33       |
| (CH <sub>3</sub> ) <sub>2</sub> CH <sup>-</sup>               | 29.28         | 32.12    | 33.56        | 5.04       |
| (CH <sub>3</sub> ) <sub>3</sub> C <sup>-</sup>                | 28.64         | 32.14    | 33.27        | 5.95       |
| (C <sub>6</sub> H <sub>5</sub> )CH <sub>2</sub> <sup>-</sup>  | 28.14         | 32.86    | 33.19        | 5.82       |
| (C <sub>6</sub> H <sub>5</sub> ) <sub>2</sub> CH <sup>-</sup> | 26.68         | 33.35    | 31.94        | 8.04       |
| (C <sub>6</sub> H <sub>5</sub> ) <sub>3</sub> C <sup>-</sup>  | 14.84         | 26.51    | 10.55        | 48.11      |
| NH <sub>2</sub> <sup>-</sup>                                  | 29.07         | 32.80    | 34.19        | 3.95       |
| (CH <sub>3</sub> )NH <sup>-</sup>                             | 28.75         | 32.38    | 34.21        | 4.66       |
| (CH <sub>3</sub> ) <sub>2</sub> N <sup>-</sup>                | 27.78         | 32.36    | 34.04        | 5.82       |
| (C <sub>6</sub> H <sub>5</sub> )NH <sup>-</sup>               | 26.90         | 33.65    | 33.13        | 6.32       |
| (C <sub>6</sub> H <sub>5</sub> ) <sub>2</sub> N <sup>-</sup>  | 8.51          | 29.61    | 13.49        | 48.39      |
| OH <sup>-</sup>                                               | 28.31         | 33.12    | 34.62        | 3.95       |
| (CH <sub>3</sub> )O <sup>-</sup>                              | 27.60         | 32.96    | 34.30        | 5.14       |
| (C <sub>6</sub> H <sub>5</sub> )O <sup>-</sup>                | 3.59          | 32.73    | 20.32        | 43.36      |

**Table S6(C).** Percentage contribution of each energy component into the interaction energy of cationic substrates-pyrene complexes obtained using LMOEDA scheme at M06-2X/6-311G\*\* level of theory.

| Systems                                                       | Electrostatic | Exchange | Polarization | Dispersion |
|---------------------------------------------------------------|---------------|----------|--------------|------------|
| H <sup>o</sup>                                                | -             | -        | -            | -          |
| CH <sub>3</sub> <sup>o</sup>                                  | 25.84         | 31.39    | 36.12        | 6.65       |
| (CH <sub>3</sub> )CH <sub>2</sub> <sup>o</sup>                | 26.03         | 31.62    | 34.70        | 7.65       |
| (CH <sub>3</sub> ) <sub>2</sub> CH <sup>o</sup>               | 25.83         | 31.82    | 33.37        | 8.97       |
| (CH <sub>3</sub> ) <sub>3</sub> C <sup>o</sup>                | 25.40         | 32.01    | 32.17        | 10.42      |
| (C <sub>6</sub> H <sub>5</sub> )CH <sub>2</sub> <sup>o</sup>  | 25.50         | 32.14    | 33.35        | 9.00       |
| (C <sub>6</sub> H <sub>5</sub> ) <sub>2</sub> CH <sup>o</sup> | 24.73         | 32.68    | 31.04        | 11.55      |
| (C <sub>6</sub> H <sub>5</sub> ) <sub>3</sub> C <sup>o</sup>  | 13.88         | 24.12    | 5.13         | 56.87      |
| NH <sub>2</sub> <sup>o</sup>                                  | 26.01         | 31.81    | 36.33        | 5.85       |
| (CH <sub>3</sub> )NH <sup>o</sup>                             | 26.67         | 32.07    | 34.82        | 6.44       |
| (CH <sub>3</sub> ) <sub>2</sub> N <sup>o</sup>                | 26.82         | 32.49    | 33.24        | 7.46       |
| (C <sub>6</sub> H <sub>5</sub> )NH <sup>o</sup>               | 26.13         | 32.63    | 33.71        | 7.54       |
| (C <sub>6</sub> H <sub>5</sub> ) <sub>2</sub> N <sup>o</sup>  | 26.29         | 32.26    | 32.62        | 8.84       |
| OH <sup>o</sup>                                               | 23.22         | 30.85    | 39.86        | 6.06       |
| (CH <sub>3</sub> )O <sup>o</sup>                              | 24.06         | 31.49    | 37.63        | 6.81       |
| (C <sub>6</sub> H <sub>5</sub> )O <sup>o</sup>                | 24.64         | 32.69    | 34.92        | 7.75       |



**Table S7(A):** The variation of electron density ( $\rho$ ), Laplacian of electron density ( $\nabla^2\rho$ ), total energy density ( $H(\mathbf{r})$ ), and the ratio of kinetic energy density  $G(\mathbf{r})$ , and potential energy density  $V(\mathbf{r})$ , ( $-[G(\mathbf{r})/V(\mathbf{r})]$ ) obtained at bond critical points for cationic substrates with pyrene.

| System                                                        | $\rho$  | $\nabla^2\rho$ | $H(\mathbf{r})$ | $(-[G(\mathbf{r})/V(\mathbf{r})])$ |
|---------------------------------------------------------------|---------|----------------|-----------------|------------------------------------|
| H <sup>+</sup>                                                | 0.23836 | -0.70453       | -0.21889        | 0.16343                            |
| CH <sub>3</sub> <sup>+</sup>                                  | 0.17185 | -0.23997       | -0.10953        | 0.31141                            |
| (CH <sub>3</sub> )CH <sub>2</sub> <sup>+</sup>                | 0.14761 | -0.15500       | -0.08277        | 0.34719                            |
| (CH <sub>3</sub> ) <sub>2</sub> CH <sup>+</sup>               | 0.02921 | 0.02090        | -0.00737        | 0.63083                            |
| (CH <sub>3</sub> ) <sub>3</sub> C <sup>+</sup>                | 0.01050 | 0.03085        | 0.00133         | 1.26408                            |
| (C <sub>6</sub> H <sub>5</sub> )CH <sub>2</sub> <sup>+</sup>  | 0.01912 | 0.03610        | -0.00101        | 0.90820                            |
| (C <sub>6</sub> H <sub>5</sub> ) <sub>2</sub> CH <sup>+</sup> | 0.00885 | 0.02707        | 0.00118         | 1.26881                            |
| (C <sub>6</sub> H <sub>5</sub> ) <sub>3</sub> C <sup>+</sup>  | 0.00829 | 0.02737        | 0.00125         | 1.28904                            |
| NH <sub>2</sub> <sup>+</sup>                                  | 0.22744 | -0.42137       | -0.19288        | 0.31216                            |
| (CH <sub>3</sub> )NH <sup>+</sup>                             | 0.11411 | -0.16514       | -0.08679        | 0.34397                            |
| (CH <sub>3</sub> ) <sub>2</sub> N <sup>+</sup>                | 0.07423 | -0.07267       | -0.04835        | 0.38433                            |
| (C <sub>6</sub> H <sub>5</sub> )NH <sup>+</sup>               | 0.09614 | -0.08058       | -0.06016        | 0.39945                            |
| (C <sub>6</sub> H <sub>5</sub> ) <sub>2</sub> N <sup>+</sup>  | 0.06668 | -0.04320       | -0.03902        | 0.41968                            |
| OH <sup>+</sup>                                               | 0.24376 | -0.50914       | -0.28911        | 0.35887                            |
| (CH <sub>3</sub> )O <sup>+</sup>                              | 0.24060 | -0.49276       | -0.27343        | 0.35462                            |
| (C <sub>6</sub> H <sub>5</sub> )O <sup>+</sup>                | 0.21252 | -0.33722       | -0.20419        | 0.36992                            |

**Table S7(B):** The variation of electron density ( $\rho$ ), Laplacian of electron density ( $\nabla^2\rho$ ), total energy density ( $H(\mathbf{r})$ ), and the ratio of kinetic energy density  $G(\mathbf{r})$ , and potential energy density  $V(\mathbf{r})$ , ( $-[G(\mathbf{r})/V(\mathbf{r})]$ ) obtained at bond critical points for anionic substrates with pyrene.

| System                                                        | $\rho$  | $\nabla^2\rho$ | $H(\mathbf{r})$ | $(-[G(\mathbf{r})/V(\mathbf{r})])$ |
|---------------------------------------------------------------|---------|----------------|-----------------|------------------------------------|
| H <sup>-</sup>                                                | 0.25984 | -0.81513       | -0.24641        | 0.14747                            |
| CH <sub>3</sub> <sup>-</sup>                                  | 0.23164 | -0.48750       | -0.17743        | 0.23846                            |
| (CH <sub>3</sub> )CH <sub>2</sub> <sup>-</sup>                | 0.22809 | -0.46717       | -0.17104        | 0.24080                            |
| (CH <sub>3</sub> ) <sub>2</sub> CH <sup>-</sup>               | 0.22063 | -0.43137       | -0.15934        | 0.24425                            |
| (CH <sub>3</sub> ) <sub>3</sub> C <sup>-</sup>                | 0.07720 | -0.10440       | -0.04713        | 0.30853                            |
| (C <sub>6</sub> H <sub>5</sub> )CH <sub>2</sub> <sup>-</sup>  | 0.21092 | -0.38417       | -0.14861        | 0.26131                            |
| (C <sub>6</sub> H <sub>5</sub> ) <sub>2</sub> CH <sup>-</sup> | 0.05388 | -0.04692       | -0.02839        | 0.36978                            |
| (C <sub>6</sub> H <sub>5</sub> ) <sub>3</sub> C <sup>-</sup>  | 0.00744 | 0.02340        | 0.00098         | 1.25298                            |
| NH <sub>2</sub> <sup>-</sup>                                  | 0.24072 | -0.54063       | -0.23454        | 0.29762                            |
| (CH <sub>3</sub> )NH <sup>-</sup>                             | 0.23901 | -0.52545       | -0.23060        | 0.30088                            |
| (CH <sub>3</sub> ) <sub>2</sub> N <sup>-</sup>                | 0.22908 | -0.46986       | -0.21112        | 0.30729                            |
| (C <sub>6</sub> H <sub>5</sub> )NH <sup>-</sup>               | 0.10747 | -0.15210       | -0.08496        | 0.35585                            |
| (C <sub>6</sub> H <sub>5</sub> ) <sub>2</sub> N <sup>-</sup>  | 0.00750 | 0.02230        | 0.00088         | 1.23124                            |
| OH <sup>-</sup>                                               | 0.22776 | -0.41982       | -0.26103        | 0.37419                            |
| (CH <sub>3</sub> )O <sup>-</sup>                              | 0.21746 | -0.36548       | -0.23431        | 0.37890                            |
| (C <sub>6</sub> H <sub>5</sub> )O <sup>-</sup>                | 0.00926 | 0.02865        | 0.00103         | 1.20288                            |

**Table S7(C):** The variation of electron density ( $\rho$ ), Laplacian of electron density ( $\nabla^2\rho$ ), total energy density ( $H(\mathbf{r})$ ), and the ratio of kinetic energy density  $G(\mathbf{r})$ , and potential energy density  $V(\mathbf{r})$ , ( $-[G(\mathbf{r})/V(\mathbf{r})]$ ) obtained at bond critical points for radical substrates with pyrene.

| System                            | $\rho$  | $\nabla^2\rho$ | $H(\mathbf{r})$ | $(-[G(\mathbf{r})/V(\mathbf{r})])$ |
|-----------------------------------|---------|----------------|-----------------|------------------------------------|
| H $^\circ$                        | 0.25433 | -0.78691       | -0.23932        | 0.15108                            |
| CH $_3^\circ$                     | 0.21272 | -0.40034       | -0.15395        | 0.25919                            |
| (CH $_3$ )CH $_2^\circ$           | 0.20452 | -0.36193       | -0.14221        | 0.26674                            |
| (CH $_3$ ) $_2$ CH $^\circ$       | 0.07190 | -0.07701       | -0.04090        | 0.34608                            |
| (CH $_3$ ) $_3$ C $^\circ$        | 0.04476 | -0.02285       | -0.02064        | 0.41968                            |
| (C $_6$ H $_5$ )CH $_2^\circ$     | 0.19315 | -0.31008       | -0.12771        | 0.28213                            |
| (C $_6$ H $_5$ ) $_2$ CH $^\circ$ | 0.06332 | -0.05614       | -0.03289        | 0.36435                            |
| (C $_6$ H $_5$ ) $_3$ C $^\circ$  | 0.00745 | 0.02263        | 0.00099         | 1.26895                            |
| NH $_2^\circ$                     | 0.23903 | -0.50802       | -0.22198        | 0.29965                            |
| (CH $_3$ )NH $^\circ$             | 0.23709 | -0.48911       | -0.21629        | 0.30297                            |
| (CH $_3$ ) $_2$ N $^\circ$        | 0.22709 | -0.43455       | -0.19677        | 0.30935                            |
| (C $_6$ H $_5$ )NH $^\circ$       | 0.11458 | -0.17981       | -0.09261        | 0.33976                            |
| (C $_6$ H $_5$ ) $_2$ N $^\circ$  | 0.07802 | -0.11392       | -0.06166        | 0.34985                            |
| OH $^\circ$                       | 0.23805 | -0.47118       | -0.28191        | 0.36795                            |
| (CH $_3$ )O $^\circ$              | 0.23378 | -0.44906       | -0.26837        | 0.36776                            |
| (C $_6$ H $_5$ )O $^\circ$        | 0.20874 | -0.32340       | -0.20873        | 0.37991                            |
